# 1 A tropane-based ibogaine analog rescues folding-deficient SERT and DAT

2  
3  
4 Shreyas Bhat\*<sup>1</sup>, Daryl A. Guthrie\*<sup>2</sup>, Ameya Kasture<sup>3</sup>, Ali El-Kasaby<sup>1</sup>, Jianjing Cao<sup>2</sup>,  
5 Alessandro Bonifazi<sup>2</sup>, Therese Ku<sup>2</sup>, JoLynn B. Giancola<sup>2</sup>, Thomas Hummel<sup>3</sup>, Michael  
6 Freissmuth<sup>‡1</sup> and Amy Hauck Newman<sup>‡2</sup>

7  
8 Affiliations: <sup>1</sup>Institute of Pharmacology and the Gaston H. Glock Research Laboratories for Exploratory Drug  
9 Development, Center of Physiology and Pharmacology, Medical University of Vienna, Vienna,  
10 Waehringerstrasse 13a, Vienna, Austria; <sup>2</sup>Molecular Targets and Medications Discovery Branch, National  
11 Institute on Drug Abuse, Intramural Research Program, Baltimore, MD 21224, U.S.A.; <sup>3</sup>Department of  
12 Neurobiology, University of Vienna, Austria.

13  
14 \*S. Bhat and D. Guthrie contributed equally to this paper.

15  
16 ‡Correspondence: Michael Freissmuth ([michael.freissmuth@meduniwien.ac.at](mailto:michael.freissmuth@meduniwien.ac.at)), Amy Hauck Newman  
17 ([anewman@intra.nida.nih.gov](mailto:anewman@intra.nida.nih.gov))

## 18 19 20 **Abstract**

21 Missense mutations that give rise to protein misfolding are rare, but collectively, defective  
22 protein folding diseases are consequential. Folding deficiencies are amenable to  
23 pharmacological correction (pharmacochaperoning), but the underlying mechanisms remain  
24 enigmatic. Ibogaine and its active metabolite noribogaine correct folding defects in the  
25 dopamine transporter (DAT), but they rescue only a very limited number of folding-deficient  
26 DAT mutants, which give rise to infantile Parkinsonism and dystonia. Herein, a series of  
27 analogs was generated by reconfiguring the complex ibogaine ring system and exploring the  
28 structural requirements for binding to wild type transporters, and for rescuing two equivalent  
29 synthetic folding-deficient mutants, SERT-PG<sup>601,602</sup>AA and DAT-PG<sup>584,585</sup>AA. The most  
30 active tropane-based analog (**9b**) was also an effective pharmacochaperone *in vivo*, in  
31 *Drosophila* harboring DAT-PG<sup>584,585</sup>AA and rescued six out of 13 disease-associated human  
32 DAT mutants *in vitro*. Hence, a novel lead pharmacochaperone has been identified that  
33 demonstrates medication development potential for patients harboring DAT mutants.

## 36 **Introduction**

37 Ibogaine, one of many alkaloids first isolated from the shrub *Tabernanthe iboga* in 1901  
38 (*Dybowski and Landrin, 1901*), has three interesting pharmacological properties: (i) it is  
39 hallucinogenic; presumably the reason why it has been used for centuries by West African  
40 tribes in rites of passage (*Wasko et al., 2018; Corkery, 2018*). (ii) It has been reported to  
41 mitigate substance use disorders (*Corkery, 2018; Brown and Alper, 2018; Noller et al., 2018*).  
42 These actions have also been recapitulated in experimental paradigms, where animals are  
43 given the opportunity to self-administer or express their preference for morphine and  
44 psychostimulants (*Glick et al., 1991; Glick et al., 1994; Blackburn and Szumlinski, 1997*);  
45 (iii) Ibogaine and its principal, active metabolite noribogaine (12-hydroxyibogamine; ref.  
46 *Mash et al., 1995*) bind to the transporters for the monoamines serotonin (SERT), dopamine  
47 (DAT) and norepinephrine (NET) (*Mash et al., 1995; Sweetnam et al., 1995*). Moreover,  
48 ibogaine and noribogaine were the first compounds that were shown to rescue folding-  
49 deficient versions of SERT (*El-Kasaby et al., 2010; El-Kasaby et al., 2014; Koban et al.,*  
50 *2015*) and of DAT (*Kasture et al., 2016; Beerepoot et al., 2016; Asjad et al., 2017*). This  
51 pharmacochaperoning action of ibogaine and noribogaine is of therapeutic interest because  
52 folding-deficient mutants of DAT give rise to the dopamine transporter deficiency syndrome  
53 or DTDS (*Kurian et al., 2011; Ng et al., 2014*). DTDS is a hyperkinetic movement disorder in  
54 DAT deficient patients that progresses into Parkinsonism and dystonia. This disease manifests  
55 generally in the first 6 months post birth (infantile) or occasionally during childhood,  
56 adolescence or adulthood (juvenile). The cell surface levels of DAT variants associated with  
57 DTDS are typically non-detectable (in infantile cases) or severely reduced (in juvenile cases)  
58 due to their misfolding and subsequent retention within the endoplasmic reticulum (ER).  
59 While the use of ibogaine or noribogaine as a medication for DTDS is warranted, its  
60 hallucinogenic profile will likely preclude its therapeutic usefulness in this patient population  
61 (*Wasko et al., 2018*).

62

63 The closely related monoamine transporters SERT (*SLC6A4*), DAT (*SLC6A3*) and NET  
64 (*SLC6A2*) form a branch of the solute carrier-6 (SLC6) family of secondary active  
65 transporters (*Kristensen et al., 2011*). They modulate monoaminergic neurotransmission by  
66 retrieving their eponymous substrates from the synaptic cleft, which supports replenishing of  
67 vesicular stores. SERT and - to a lesser extent - NET are the most important targets for  
68 antidepressants, which act as inhibitors. For example, SSRIs (selective serotonin reuptake  
69 inhibitors) are used to treat major depression, obsessive-compulsive disorders, and general

70 anxiety disorders. The therapeutic indication for DAT inhibition is more restricted (e.g.,  
71 methylphenidate for attention-deficit-hyperactivity disorder or modafinil for sleep disorders).  
72 However, DAT is a prominent target for illicit drugs (e.g., cocaine and amphetamines). This is  
73 also true to some extent for SERT, which is the target of 3,4-methylene-  
74 dioxymethamphetamine (MDMA, ecstasy) and its congeners. Thus, the chemical space for  
75 these transporter targets has been explored (*Sitte and Freissmuth, 2015*). Of note, monoamine  
76 transporter ligands can range from full substrates to typical inhibitors, as well as atypical  
77 inhibitors, depending on chemical structure and transporter conformation (*Schmitt et al.,*  
78 *2013; Reith et al., 2015; Bhat et al., 2019*). Typical inhibitors (e.g. cocaine, most  
79 antidepressants) bind to and trap the transporter in the outward facing state thus precluding  
80 any subsequent conformational transition required for entry of the protein into a transport  
81 mode. In contrast, the substrate-bound transporter enters an occluded state. Substrate  
82 translocation is initiated by opening of an inner gate, which releases the substrate together  
83 with co-substrate ions ( $\text{Na}^+$  and  $\text{Cl}^-$ ) on the intracellular side (*Sitte and Freissmuth, 2015*).  
84 Full substrates allow the transporter to undergo its transport cycle in a manner  
85 indistinguishable from cognate neurotransmitter. Full substrates, which differ from  
86 neurotransmitters in their cooperative interaction with the co-transported sodium, act as  
87 amphetamine-like releasers by driving the transporter into an exchange mode (*Hasenhuetl et*  
88 *al., 2019*). Partial substrates/releasers support the transport cycle/exchange mode albeit less  
89 efficiently than full substrates/releasers, because they bind tightly to conformational  
90 intermediates and thus preclude rapid transitions (*Bhat et al., 2017*). Atypical inhibitors trap  
91 the transporter in conformations other than the outward facing state. Ibogaine is an atypical  
92 inhibitor that binds the inward-facing state of SERT (*Jacobs et al., 2007; Bulling et al., 2012;*  
93 *Burtscher et al., 2018; Coleman et al., 2019*) and, presumably, of DAT and NET. Several  
94 arguments support the conjecture that the folding trajectory of monoamine transporters  
95 proceeds through the inward facing state (*Freissmuth et al., 2017*), thus providing a  
96 mechanistic basis for rationalizing the pharmacochaperoning action of ibogaine (*El-Kasaby et*  
97 *al., 2010; El-Kasaby et al., 2014; Koban et al., 2015; Kasture et al., 2016; Beerepoot et al.,*  
98 *2016; Asjad et al., 2017*) and of other compounds (*Bhat et al., 2017*).

99 Ibogaine and its metabolite noribogaine are the most efficacious pharmacochaperones  
100 for folding-deficient versions of SERT and DAT identified to date and provide templates to  
101 generate promising new leads. In this study, we explored the chemistry of ibogaine to broaden  
102 the efficacy profile for this drug in rescuing misfolded SERT and DAT mutants. Ibogaine has  
103 a complex and rigid structure, which until recently has been largely unexplored (*Kruegel et*

104 *al.*, 2015, Gassaway *et al.*, 2016). Here, we generated a series of novel ibogaine analogs by  
105 investigating the chemical space surrounding the parent molecule using a two-pronged  
106 approach: 1) Deconstructing ibogaine by introducing flexible hydrocarbon linkers that  
107 connect the indole ring to either a isoquinuclidine ring or a tropane ring and 2) Reconfiguring  
108 and completely substituting the isoquinuclidine ring of ibogaine with the tropane ring system.  
109 This allowed for defining structural determinants required for high-affinity binding to wild  
110 type SERT and DAT and for pharmacochaperoning two synthetic folding-deficient mutants:  
111 SERT-PG<sup>601,602</sup>AA and the orthologous DAT-PG<sup>584,585</sup>AA. Based on these experiments, we  
112 identified a novel fluorinated tropane-based analog, which was more potent and more  
113 efficacious than the parent compound in rescuing misfolded versions of SERT and DAT,  
114 including disease-relevant DTDS mutants. Importantly, this compound was active *in vivo* and  
115 restored sleep to flies harboring a misfolded DAT mutant.

## 116 117 **Results**

### 118 ***Synthesis***

119 Ibogaine can be viewed as a serotonin analog, where the basic nitrogen is fixed in space by a  
120 fused bicyclic ring structure (*cf.* **Table 1**). Two strategic approaches were undertaken that  
121 yielded a number of unique products to the ibogaine series in relatively few synthetic steps.  
122 The first approach (**Scheme 1A**) involved a deconstructive strategy, whereby the indole ring  
123 was disconnected from the isoquinuclidine ring structure, thereby offering greater flexibility  
124 along with a comparable number of hydrocarbon atoms by either retaining the isoquinuclidine  
125 ring (**4a–c**) or replacing it with a tropane ring (**3a–f**). The second approach (**Scheme 1B**)  
126 aimed to reconfigure and completely substitute the fused isoquinuclidine ring of ibogaine with  
127 the tropane ring system conferring the novel intermediate amides (**8a–c**) and their reduced  
128 tertiary amine analogs (**9a–d**). Of note, the tropane ring is a hallmark structure in many  
129 classical monoamine transporter inhibitors (e.g., cocaine, benztropine) and thus was  
130 envisioned to potentially retain binding affinities at DAT and SERT. In both approaches, the  
131 ethyl group of ibogaine was eliminated to save on synthetic effort. In addition, we surmised  
132 that the ethyl group was immaterial for binding affinity (see below).

133

**A. Synthesis of deconstructed ibogaine analogs 3a–f and 4a–c**<sup>a</sup>

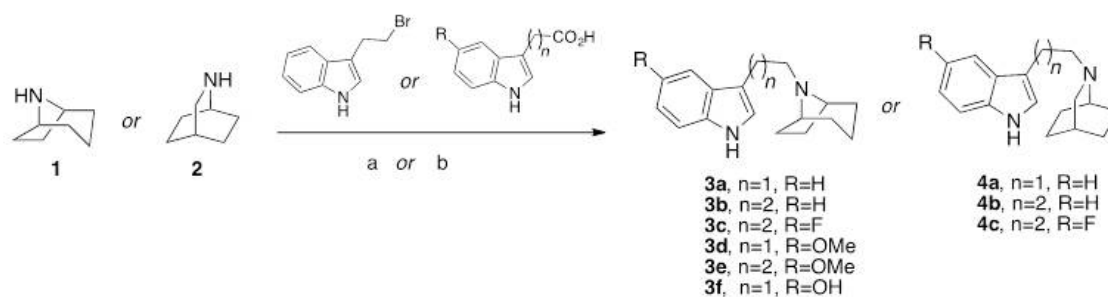

<sup>a</sup> Reagents and conditions: (a) 3-(2-bromoethyl)-1H-indole, **1** or **2**, K<sub>2</sub>CO<sub>3</sub>, CH<sub>3</sub>CN, reflux; (b) i. appropriate 3-indoleacetic acid or 3-indolepropanoic acid, CDI, THF, rt; ii. LAH, THF, rt.

**B. Synthesis of tropane-based ibogaine analogs 9a–d**<sup>a</sup>

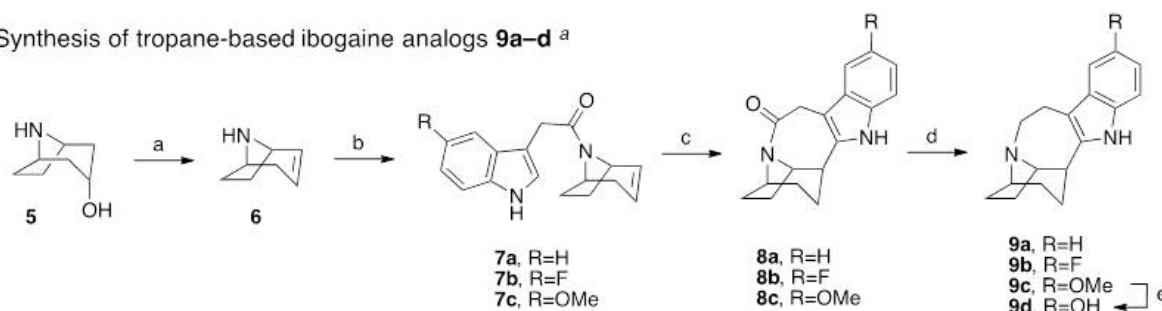

<sup>a</sup> Reagents and conditions: (a) H<sub>2</sub>SO<sub>4</sub>, 160 °C; (b) appropriate 3-indoleacetic acid, CDI, THF, rt; (c) i. Pd(CH<sub>3</sub>CN)<sub>4</sub>BF<sub>4</sub>, CH<sub>3</sub>CN, ii. NaBH<sub>4</sub>, EtOH; (d) i. BMS, THF, reflux, ii. 3N HCl, reflux; (e) 3N HCl, reflux.

134

135 **Scheme 1. Synthetic scheme of the ibogaine analogs**

136

137 The synthetic schemes of the two approaches are shown in **Scheme 1**. 8-  
 138 Azabicyclo[3.2.1]octane (nortropine, **1**) or 2-azabicyclo[2.2.2]octane (**2**) was directly linked  
 139 at the *N*-position with various indole substituents via either nucleophilic substitution with 3-  
 140 (2-bromoethyl)-1H-indole or by tandem 1,1'-carbonyldiimidazole (CDI) coupling with an  
 141 appropriate 3-indoleacetic acid or 3-indolepropanoic acid followed by lithium aluminum  
 142 hydride (LAH) reduction to give the desired products (**3a–f**, **4a–c**) as free bases (**Scheme 1A**).  
 143 The second approach (**Scheme 1B**) started similarly following the dehydration of nortropine  
 144 (**5**) in sulfuric acid to give racemic nortropidene (**6**), which was linked with an appropriate 3-  
 145 indoleacetic acid substituent via CDI coupling. Next, similarly to Trost *et al.* (Trost *et*  
 146 *al.*,1978) and Kruegel *et al.* (Kruegel *et al.*, 2015) in their syntheses of ibogamine,  
 147 electrophilic palladium promoted cyclization of racemic **7a–c**, followed by sodium  
 148 borohydride (NaBH<sub>4</sub>) reduction, gave the racemic products **8a–c**. This key step produced the  
 149 corresponding amides in good yields (63–81% yields, see Experimental Methods in S. I. for  
 150 details), without necessitating chromatographic separation. Notably, Trost *et al.* (Trost *et*  
 151 *al.*,1978) and Kruegel *et al.* (Kruegel *et al.*, 2015) reported much lower isolated yields of  
 152 ibogamine (19% and 33%, respectively) with this chemistry, by using the isoquinuclidine core

153 and corresponding amine instead. Finally, the amide reduction of racemic **8a–c** was  
154 accomplished with borane dimethyl sulfide complex (BMS) to give racemic **9a–d**, where **9d**  
155 was formed from the *O*-demethylation of **9c** following extended stirring at reflux, in 3N HCl.

156

### 157 ***Structure activity-relationship of ibogaine analogs at SERT and DAT***

158 Ligand affinities at DAT and SERT can be determined by measuring their ability to displace a  
159 radioligand from the transporter or to block substrate uptake. During substrate translocation,  
160 transporters undergo a conformational cycle. Radioligands are high-affinity inhibitors, which  
161 bind to the outward facing state. In addition, both the membrane potential and the asymmetric  
162 ion distribution are absent in binding assays with membrane preparations. Hence, affinity  
163 estimates for some ligands can differ substantially, if inhibition of substrate uptake and  
164 displacement of substrate are assessed. Because of conformational trapping in the absence of  
165 an ion gradient, these differences can reach several orders of magnitudes (*Bhat et al., 2017*).  
166 Accordingly, we determined the affinity of our novel analogs by measuring their ability to  
167 both, displace a radioligand in membranes prepared from rat brain stem (**Supplementary Fig**  
168 **1**, SERT) and rat striatum (**Supplementary Fig 2**, DAT) and inhibit cellular uptake in  
169 transfected cells (**Supplementary Figs 3 and 4** for SERT and DAT, respectively).  
170 Noribogaine is known to bind SERT with higher affinity, in both binding and uptake  
171 inhibition assays, over the methoxylated parent compound, ibogaine, and our data confirm  
172 this in **Table 1**. However, as previously reported (*Mash et al., 1995*), ibogaine and  
173 noribogaine have similar affinities for DAT (also seen in **Table 1**). It is evident from the data  
174 in **Table 1** that the *C*-12 substitutions primarily determine affinity to SERT in all analogs  
175 tested. Methoxy- (**3d, 3e, 9c**) or hydroxy-substitution (**3f, 9d**) in this 12-position has little  
176 effect on DAT affinity as compared to the unsubstituted analogs (**3a, 3b, 4a, 4b, 8a, 9a**), but  
177 the hydroxy-substituted analogs have higher affinity at SERT (**3f, 9d**). Interestingly, when the  
178 hydroxyl group is substituted with fluorine, compounds **3c, 4c** and **9b** also exhibit similar  
179 affinities at SERT to the hydroxy-analogs. Only **9b** showed submicromolar affinity for DAT,  
180 suggesting a potentially pivotal role for fluorine substitution. In addition, compounds **9c** and  
181 **9d** are ibogaine and noribogaine analogs, respectively, in which the 2-ethyl group has been  
182 removed and the isoquinuclidine core has been replaced with a tropane ring. The affinities of  
183 these compound pairs were similar at DAT and SERT (**9c**/ibogaine v. **9d**/noribogaine). These  
184 data supported our prediction that the ethyl-group on the isoquinuclidine ring of the  
185 ibogamine structure is dispensable and that the isoquinuclidine core can be replaced by  
186 tropane. The rigidity imparted by the azepine-ring (compounds **9a–d**, ibogaine, noribogaine)

187 is a minor determinant of affinity. Indeed, the affinity of compounds **3c** and **9b**, for instance,  
 188 were comparable.

189

190 **Table 1: Radioligand uptake and binding data at DAT and SERT<sup>a</sup>**

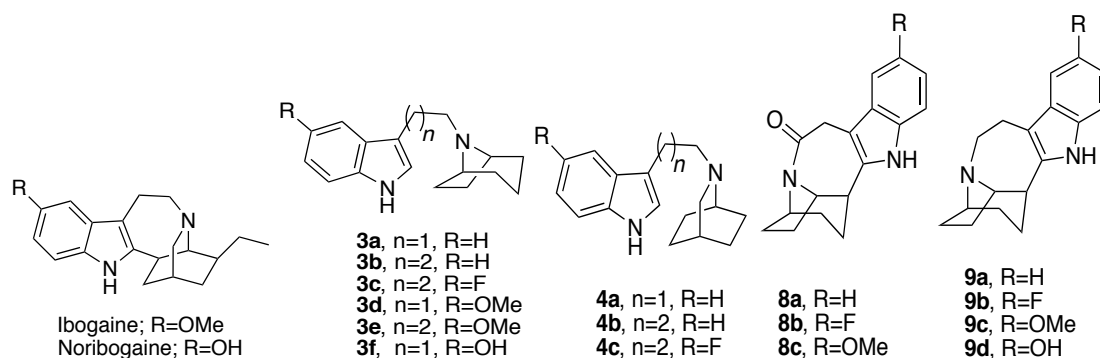

|             | Uptake inhibition  |             | Binding inhibition |             | ratio         |        | Pharmacochaperoning |           |                    |           |
|-------------|--------------------|-------------|--------------------|-------------|---------------|--------|---------------------|-----------|--------------------|-----------|
|             | $IC_{50} \pm S.D.$ |             | $K_i \pm S.D.$     |             | $IC_{50}/K_i$ |        | $EC_{50} \pm S.D.$  | $V_{max}$ | $EC_{50} \pm S.D.$ | $V_{max}$ |
|             | WT-SERT            | WT-DAT      | WT-SERT            | WT-DAT      | WT-SERT       | WT-DAT | $\mu M$             | %         | $\mu M$            | %         |
| Ibogaine    | 8.2 ± 3.5          | 22.1 ± 6.3  | 7.4 ± 0.7          | 5.3 ± 1.7   | 1.1           | 4.2    | 2.6 ± 1.9           | 103 ± 16  | 19.6 ± 4.9         | 88 ± 16   |
| Noribogaine | 1.2 ± 0.5          | 15.5 ± 7.8  | 0.6 ± 0.1          | 4.0 ± 1.8   | 2.1           | 3.9    | 4.6 ± 1.2           | 100 ± 8   | 17.1 ± 6.1         | 100 ± 13  |
| 3a          | 9.1 ± 3.1          | 25.6 ± 10.2 | 1.2 ± 0.2          | 3.1 ± 0.9   | 7.8           | 8.2    | NC*                 | 19 ± 6*   | NC*                | 15 ± 10*  |
| 3b          | 6.5 ± 5.2          | 24.4 ± 17.9 | 1.85 ± 0.3         | 1.7 ± 0.1   | 3.5           | 14.4   | 12.9 ± 6.3          | 60 ± 17   | NC*                | 15 ± 8*   |
| 3c          | 0.5 ± 0.1          | 9.09 ± 1.64 | 0.19 ± 0.03        | 4.4 ± 1.4   | 2.4           | 2.1    | 2.7 ± 0.78          | 57 ± 13   | 17.1 ± 5.6         | 47 ± 18   |
| 3d          | 11.9 ± 1.6         | 58.2 ± 41.4 | 4.5 ± 0.4          | 8.8 ± 4.94  | 2.6           | 6.6    | NC*                 | 11 ± 3*   | NC*                | 20 ± 15*  |
| 3e          | 21.6 ± 17.4        | 179 ± 94    | 13.0 ± 2.7         | 10.2 ± 3.8  | 1.7           | 17.6   | NC*                 | 38 ± 19*  | NC*                | 15 ± 9*   |
| 3f          | 0.2 ± 0.1          | 78.0 ± 27.9 | 0.12 ± 0.02        | 21.8 ± 9.4  | 1.6           | 3.6    | NC*                 | 8 ± 2*    | NC*                | 13 ± 10*  |
| 4a          | 4.6 ± 2.63         | 6.5 ± 2.1   | 0.81 ± 0.03        | 1.9 ± 0.2   | 5.7           | 3.5    | NC*                 | 25 ± 6*   | NC*                | 15 ± 9*   |
| 4b          | 8.2 ± 1.0          | 11.9 ± 1.6  | 1.7 ± 0.3          | 1.5 ± 0.3   | 4.8           | 7.7    | NC*                 | 29 ± 8*   | NC*                | 10 ± 6*   |
| 4c          | 0.3 ± 0.2          | 11.8 ± 9.1  | 0.13 ± 0.34        | 2.6 ± 0.7   | 2.5           | 4.5    | 0.7 ± 0.3           | 68 ± 16   | NC*                | 24 ± 8*   |
| 8a          | ND                 | ND          | >100               | 39.7 ± 27.9 | ND            | ND     | ND                  | ND        | ND                 | ND        |
| 8b          | ND                 | ND          | >100               | 51.2 ± 14.6 | ND            | ND     | ND                  | ND        | ND                 | ND        |
| 8c          | ND                 | ND          | >100               | 45.78 ± 6.5 | ND            | ND     | ND                  | ND        | ND                 | ND        |
| 9a          | 6.9 ± 3.9          | 16.7 ± 11.2 | 4.4 ± 0.2          | 3.6 ± 0.2   | 1.6           | 4.6    | 3.05 ± 2.3          | 94 ± 23   | 18.9 ± 2.9         | 51 ± 21   |
| 9b          | 0.4 ± 0.2          | 7.2 ± 3.8   | 0.18 ± 0.01        | 0.8 ± 0.3   | 2.3           | 8.9    | 0.06 ± 0.04         | 100 ± 6   | 25.7 ± 6.3         | 673 ± 245 |
| 9c          | 29.9 ± 16.4        | 10.8 ± 9.3  | 7.3 ± 0.5          | 3.1 ± 0.3   | 4.1           | 3.5    | 2.1 ± 0.8           | 81 ± 20   | 19.2 ± 8.7         | 53 ± 13   |
| 9d          | 0.9 ± 0.5          | 15.2 ± 9.7  | 0.78 ± 0.04        | 2.9 ± 0.3   | 1.2           | 5.3    | 1.4 ± 0.8           | 89 ± 19   | 5.8 ± 1.9          | 49 ± 30   |

192 <sup>a</sup>Each  $IC_{50}$ ,  $K_i$ ,  $K_m$  and  $V_{max}$  value represent data from at least 3 independent experiments, each  
 193 performed in triplicate.  $V_{max}$  refers to the maximum transport restored by noribogaine, which was set  
 194 at 100% to account for inter-assay variation. Experimental procedures are described in detail in  
 195 Methods. NC\*: not calculable: a reliable  $EC_{50}$  could not be estimated, because functional rescue was  
 196 too low; in this instance  $V_{max}^*$  refers to the activity restored by 30  $\mu M$  of the compound. ND: not  
 197 determined.

198

199 The amide analogs, in which the basic amine was neutralized, had substantially reduced  
200 affinities (*cf.* compounds **8a–c** and **9a–c** in **Table 1**) demonstrating the necessity for a  
201 protonatable nitrogen. In general, the affinities obtained from binding displacement were  
202 higher than those estimated from uptake inhibition. Despite this difference, in the two affinity  
203 estimates in SERT, the rank order of potency determined by uptake inhibition was reasonably  
204 similar to that determined by binding: analogs with hydroxy- and fluorine substituents were  
205 more potent in blocking substrate uptake by SERT than the methoxy- and unsubstituted  
206 counterparts (**Table 1**).

207 In DAT, all fluorinated analogs (**3c**, **4c** and **9b**) also ranked among the most potent blockers  
208 of DAT uptake (**Table 1**). However, affinity estimates from binding and uptake inhibition  
209 differed in part substantially with IC<sub>50</sub>/K<sub>i</sub> ratios ranging from 2 to 14 (**Table 1**). Variations in  
210 the ratio of IC<sub>50</sub>/K<sub>i</sub> (see **Table 1**) are indicative of differences in conformational trapping  
211 (*Bhat et al.*, 2017) rather than of species differences (rat v. human transporters). More  
212 importantly, conformational trapping is predictive of a pharmacochaperoning action (*Bhat et*  
213 *al.*, 2017). Accordingly, we determined if some of these analogs were capable of rescuing  
214 folding-deficient mutants of SERT and DAT.

215

### 216 **Pharmacochaperoning action of the ibogaine analogs on SERT-PG<sup>601,602</sup>AA and on** 217 **DAT-PG<sup>584,585</sup>AA**

218 Several folding-deficient versions of SERT have been generated and characterized to  
219 understand the actions of pharmacochaperones (*El-Kasaby et al.*, 2010; *El-Kasaby et al.*,  
220 2014; *Koban et al.*, 2015). The mutant SERT-PG<sup>601,602</sup>AA is stalled at an early stage of the  
221 folding trajectory (*El-Kasaby et al.* 2014). Hence, based on its severe phenotype, we selected  
222 this mutant to examine and compare the ability of our ibogaine analogs (i.e., compounds **3a–**  
223 **3f**, **4a–4c**, **9a–9d**) with ibogaine and noribogaine to act as pharmacochaperones. Misfolded  
224 transporters are retained in the ER and thus unavailable to accomplish their eponymous  
225 actions, that is cellular uptake of substrate. Pretreatment of cells with a pharmacochaperone  
226 restores folding of the protein and thus its subsequent delivery to the cell surface (*El-Kasaby*  
227 *et al.*, 2010; *El-Kasaby et al.*, 2014; *Koban et al.*, 2015; *Kasture et al.*, 2016; *Beerepoot et al.*,  
228 2016; *Asjad et al.*, 2017). This can be readily monitored by measuring cellular substrate  
229 uptake. As shown in **Fig. 1A**, in cells expressing SERT-PG<sup>601,602</sup>AA, there is negligible  
230 uptake of [<sup>3</sup>H]5-HT (<<10%) when compared to those expressing wild type SERT.



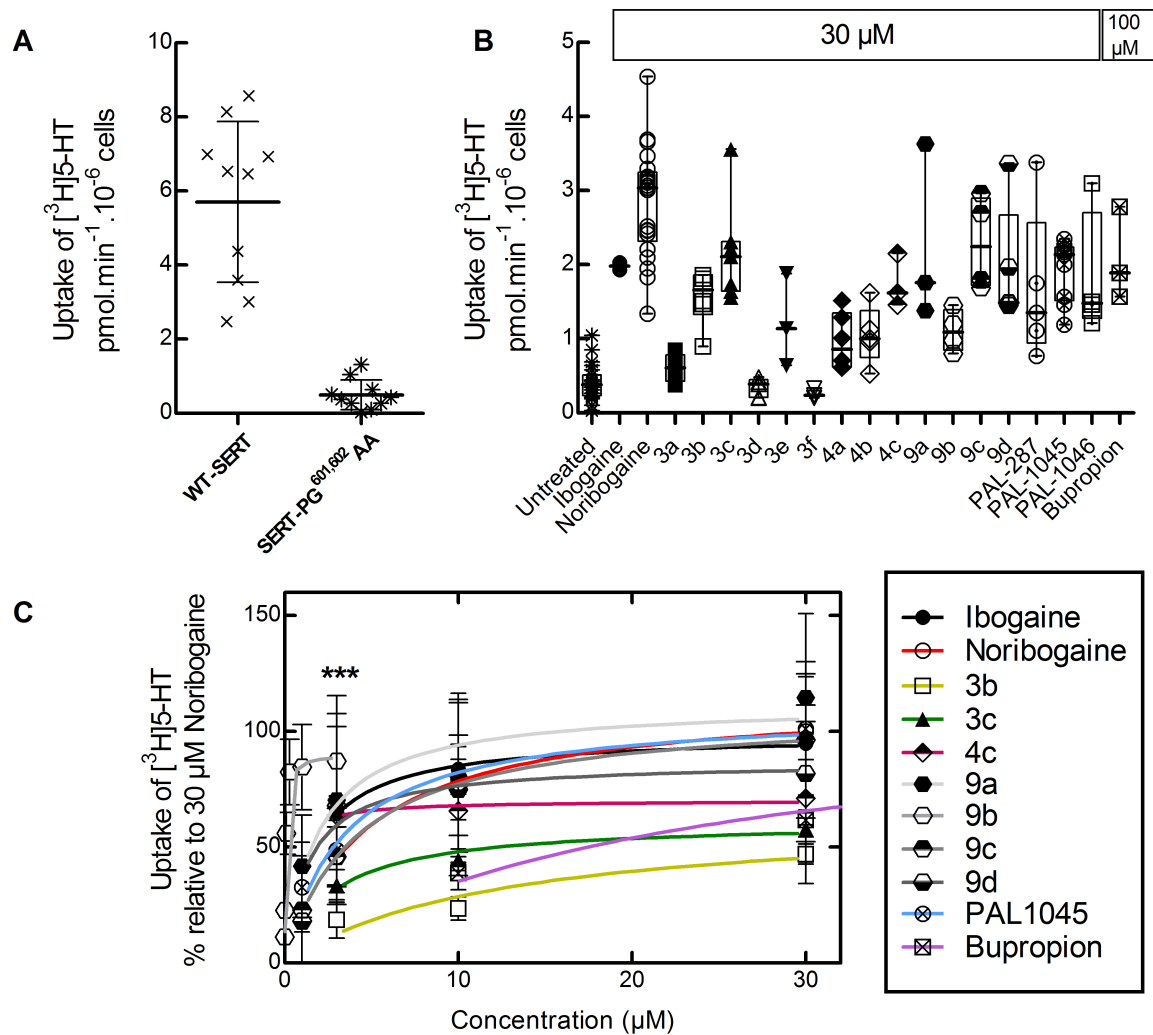

231  
 232 **Figure 1. [<sup>3</sup>H]5-HT uptake in HEK293 cells expressing hSERT-PG<sup>601,602</sup>AA after pre-incubation with**  
 233 **ibogaine analogs. A.** Comparison of [<sup>3</sup>H]5-HT uptake by HEK293 cells transiently expressing wild type  
 234 (WT) hSERT or hSERT-PG<sup>601,602</sup>AA. Each symbols represents the result from an individual experiment  
 235 (done in triplicate); means± S.D. are also shown. **B.** hSERT-PG<sup>601,602</sup>AA expressing cells were incubated  
 236 in the presence of the indicated compounds (30 μM in all instances but bupropion, 100 μM). After 24  
 237 h, [<sup>3</sup>H]5-HT uptake was determined as outlined under “Methods”. Values from individual  
 238 experiments (done in triplicate) are shown as dots; box plots show the median and the interquartile  
 239 range. **C.** Concentration-response curves for pharmacochaperoning by the indicated compounds  
 240 (selected as positive hits from *panel B*). Rescued uptake was normalized to that achieved by 30 μM  
 241 noribogaine (=100%) to account for inter-experimental variations. \*\*\*, E<sub>max</sub> for **9b** was achieved at 3  
 242 μM, uptake inhibition was observed after pre-incubation with higher concentrations. The solid lines  
 243 were drawn by fitting the data to the equation for a rectangular hyperbola (for EC<sub>50</sub> and E<sub>max</sub> of  
 244 mutant rescue see **Table 1**). Data were obtained in at least three independent experiments carried  
 245 out in triplicate. The error bars indicate S.D.

246 In cells, which were preincubated for 24 h in the presence of 30  $\mu$ M ibogaine, noribogaine  
247 and other pharmacochaperones, i.e., the naphthyl-propanamine series (PAL-287, PAL-1045  
248 and PAL-1046, *Rothman et al., 2012; Bhat et al., 2017*) and 100  $\mu$ M bupropion (*Beerepoot et*  
249 *al., 2016*), substrate uptake supported by SERT-PG<sup>601,602</sup>AA increased to levels, which  
250 corresponded to 25-40% of transport activity of wild type SERT (**Fig. 1B**). Similarly, if the  
251 cells were preincubated in the presence of 30  $\mu$ M of the new ibogaine analogs, appreciable  
252 levels of transport were seen with compounds **3b**, **3c**, **4c**, **9a**, **9c** and **9d** (**Fig. 1B**). Additional  
253 experiments (not shown) confirmed that compound **9b** was more effective at concentrations  
254 <10  $\mu$ M than at 30  $\mu$ M. Hence, it was also included in the list of positive hits, which were  
255 further investigated to determine their potency and their efficacy as pharmacochaperones. We  
256 compared their action in individual transient transfections by normalizing their pharmaco-  
257 chaperoning activity to the transport activity restored by 30  $\mu$ M noribogaine (**Fig. 1C**).  
258 Known pharmacochaperones (PAL-1045, bupropion, ibogaine and noribogaine) were also  
259 examined as reference compounds. All compounds belonging to the **9a–9d** series were as  
260 effective as noribogaine, but compound **9b** had an EC<sub>50</sub> of ~60 nM (curve represented as \*\*\*  
261 in **Fig. 1C**). The other fluoro-analog, **4c**, had an EC<sub>50</sub> of ~600 nM but was less efficacious  
262 (E<sub>max</sub> ~70% of that of noribogaine). Other compounds, including noribogaine (EC<sub>50</sub> = ~3  $\mu$ M),  
263 rescued SERT-PG<sup>601,602</sup>AA with EC<sub>50</sub>-values in the low to mid  $\mu$ M range (**Table 1**).  
264 Our data suggests **9b** to be the most potent of all compounds tested in rescuing SERT-  
265 PG<sup>601,602</sup>AA. We visualized the glycosylation state of SERT-PG<sup>601,602</sup>AA by immunoblotting  
266 to confirm the pharmacochaperoning action of **9b** by an independent approach. During their  
267 synthesis in the ER, membrane proteins undergo N-linked core glycosylation; this core  
268 glycan, which can be removed by endoglycosidase H, is thus present on ER-retained  
269 misfolded mutants. Rescued mutants are exported to the Golgi, where they acquire additional  
270 sugar moieties. The resulting complex glycan structure is resistant to cleavage by  
271 endoglycosidase H. The core glycosylated protein is homogeneous and smaller in size than  
272 the mature glycosylated version, which is heterogeneous due to the stochastic nature of  
273 complex glycosylation. Accordingly, in lysates prepared from transiently transfected cells,  
274 wild type SERT was visualized by immunoblotting as a band migrating at 75 kDa and broad  
275 smear coalescing from a collection of bands in the range of 90 to 110 kDa (left hand lane, **Fig.**  
276 **2A**). The size of the lower band was reduced after cleavage by endoglycosidase H (*cf.* first  
277 and second lane in **Fig. 2C**) confirming that it corresponded to the core glycosylated band  
278 ("C"). In contrast, the migration of the collection of upper bands was insensitive to cleavage

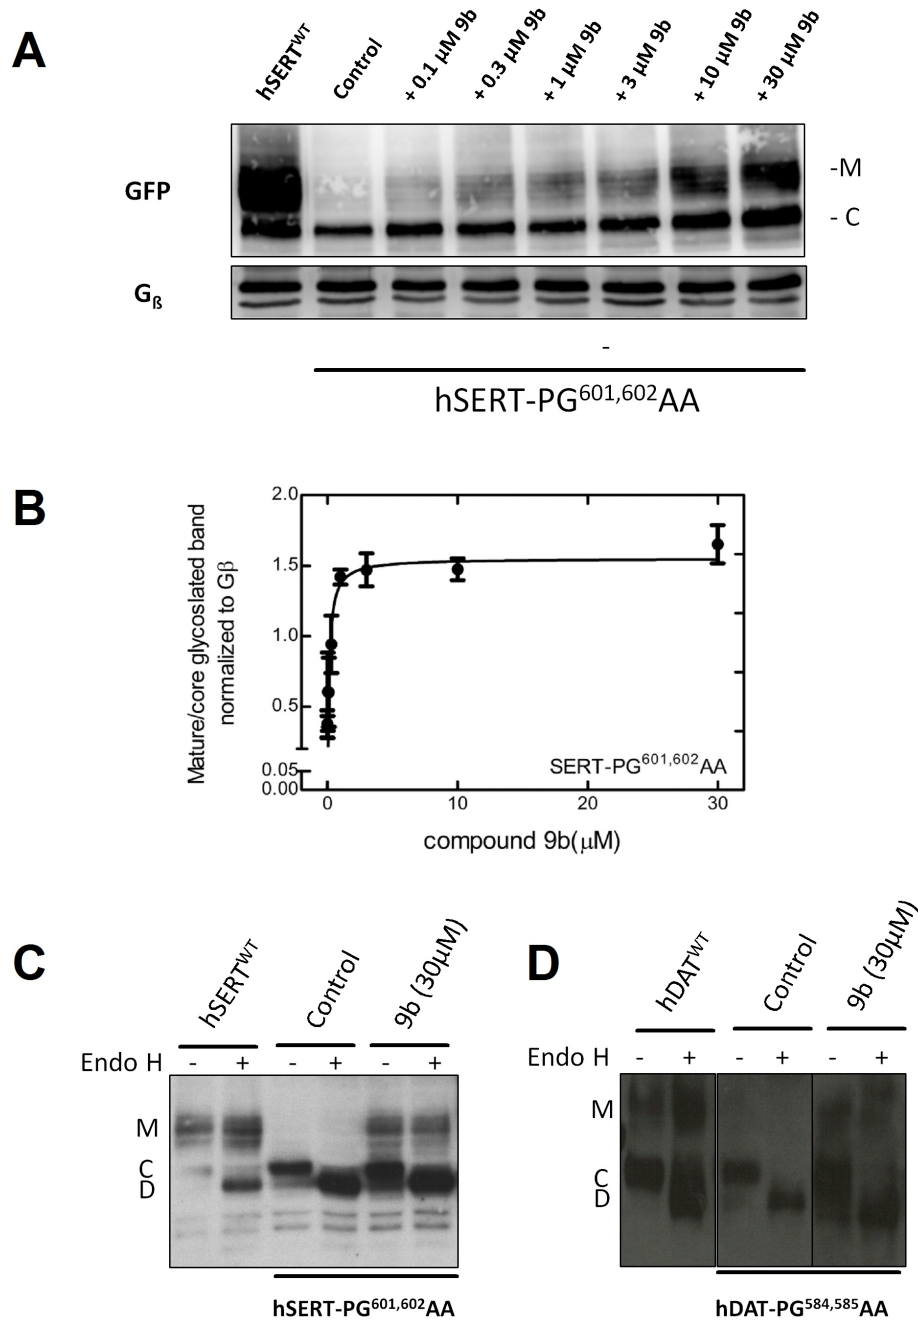

279  
 280 **Figure 2. Enhanced mature glycosylation of hSERT-PG<sup>601,602</sup>AA or hDAT-PG<sup>584,585</sup>AA in cells pre-incu-**  
 281 **bated with 9b. A.** HEK293 cells transiently expressing hSERT-PG<sup>601,602</sup>AA were incubated in the  
 282 absence (negative control = lane 2) or presence of the indicated concentrations of **9b** for 24 h. Cells  
 283 expressing wild type (WT) hSERT were the positive control (first labeled as hSERT<sup>WT</sup>). Membrane  
 284 proteins extracted from these cells were denatured, electrophoretically resolved and transferred  
 285 onto nitrocellulose membranes. The blots were incubated overnight at 4 °C with anti-GFP (top) or  
 286 anti-Gβ (bottom, loading control) antibodies. The immunoreactive bands were detected with using a  
 287 horseradish peroxidase-conjugated secondary antibody. **B.** Concentration-response curve generated  
 288 from three independent experiments carried out as in A. The ratio of mature (M) to core glycosylated

289 band (C) was quantified densitometrically, normalized to the density of G $\beta$  (loading control) and  
290 compared with the ratio observed in each blot for untreated control cells. The density ratios for  
291 untreated control cells and those exposed to 30 $\mu$ M compound **9b** (30  $\mu$ M) were  $0.38 \pm 0.09$  and  $1.65$   
292  $\pm 0.14$ , respectively. The solid line was drawn by fitting the data to the equation for a rectangular  
293 hyperbola. The EC<sub>50</sub> of rescue was  $134 \pm 30$  nM. **C.** and **D.** In separate experiments, lysates were  
294 prepared from cells expressing the SERT-PG<sup>601,602</sup>AA and DAT-PG<sup>584,585</sup>AA mutants treated in the  
295 absence or presence of 30  $\mu$ M **9b and** subjected to enzymatic digestion by endoglycosidase H (Endo  
296 H). Endo H specifically cleaves core glycans (C) to generate lower molecular weight deglycosylated  
297 fragments (D). Mature glycosylated bands (M) are resistant to the actions of Endo H.

298  
299 by endoglycosidase H confirming that they had acquired the mature glycan (*cf.* bands "M" in  
300 first and second lane in **Fig. 2C**). In contrast, lysates from cells expressing SERT-PG<sup>601,602</sup>AA  
301 contain predominantly the core glycosylated protein (second lane in **Fig. 2A** showing control  
302 cells). As predicted from its ability to restore substrate uptake in pretreated cells (**Fig. 1B,C**),  
303 **9b** induced the appearance of slowly migrating forms of SERT-PG<sup>601,602</sup>AA in lysates  
304 prepared after preincubation of the cells in a concentration-dependent manner (lanes 3 to 8 in  
305 **Fig. 2A**). Plotting this concentration response revealed an EC<sub>50</sub> of  $134 \pm 30$  nM (**Fig. 2B**),  
306 which is in excellent agreement with that calculated from restoration of substrate uptake (**Fig.**  
307 **1C** and **Table 1**). We confirmed that the mature glycosylated species of the rescued mutant is  
308 resistant to cleavage by endoglycosidase H (shown for lysates from cells compound **9b**-  
309 pretreated cells in **Fig. 2C**).

310 We posited that the potency and efficacy of the ibogaine analogs in pharmacochaperoning  
311 SERT and DAT would best be compared in the equivalent folding-deficient mutants. The  
312 residues P<sup>601</sup> and G<sup>602</sup> in SERT are conserved in DAT at positions P<sup>584</sup> and G<sup>585</sup>, respectively.  
313 Thus, we created DAT-PG<sup>584,585</sup>AA and verified that it was retained within the cell (not  
314 shown), accumulated predominantly as core glycosylated species (*cf.* lanes 3 & 4 and lanes 1  
315 & 2 in **Fig. 2D**) and only mediated very low level of substrate uptake (**Fig. 3A**). The folding  
316 deficiency of this mutant is not only expected based on the homology of SERT and DAT but  
317 also predicted from earlier work: mutation of glycine<sup>585</sup> to an alanine in DAT suffices to  
318 completely abrogate surface expression of the transporter (*Miranda et al., 2004*). As shown in  
319 **Fig. 3B**, if cells transiently expressing DAT-PG<sup>584,585</sup>AA were preincubated in the presence of  
320 30  $\mu$ M noribogaine, there was a robust increase (~6 fold) in substrate uptake. Of the other  
321 known pharmacochaperones, ibogaine, PAL-287 and PAL-1046 (but not PAL-1045) were  
322 also active. Of the ibogaine analogs, compounds **3c**, **4c** (the fluorinated open-ring analogs)

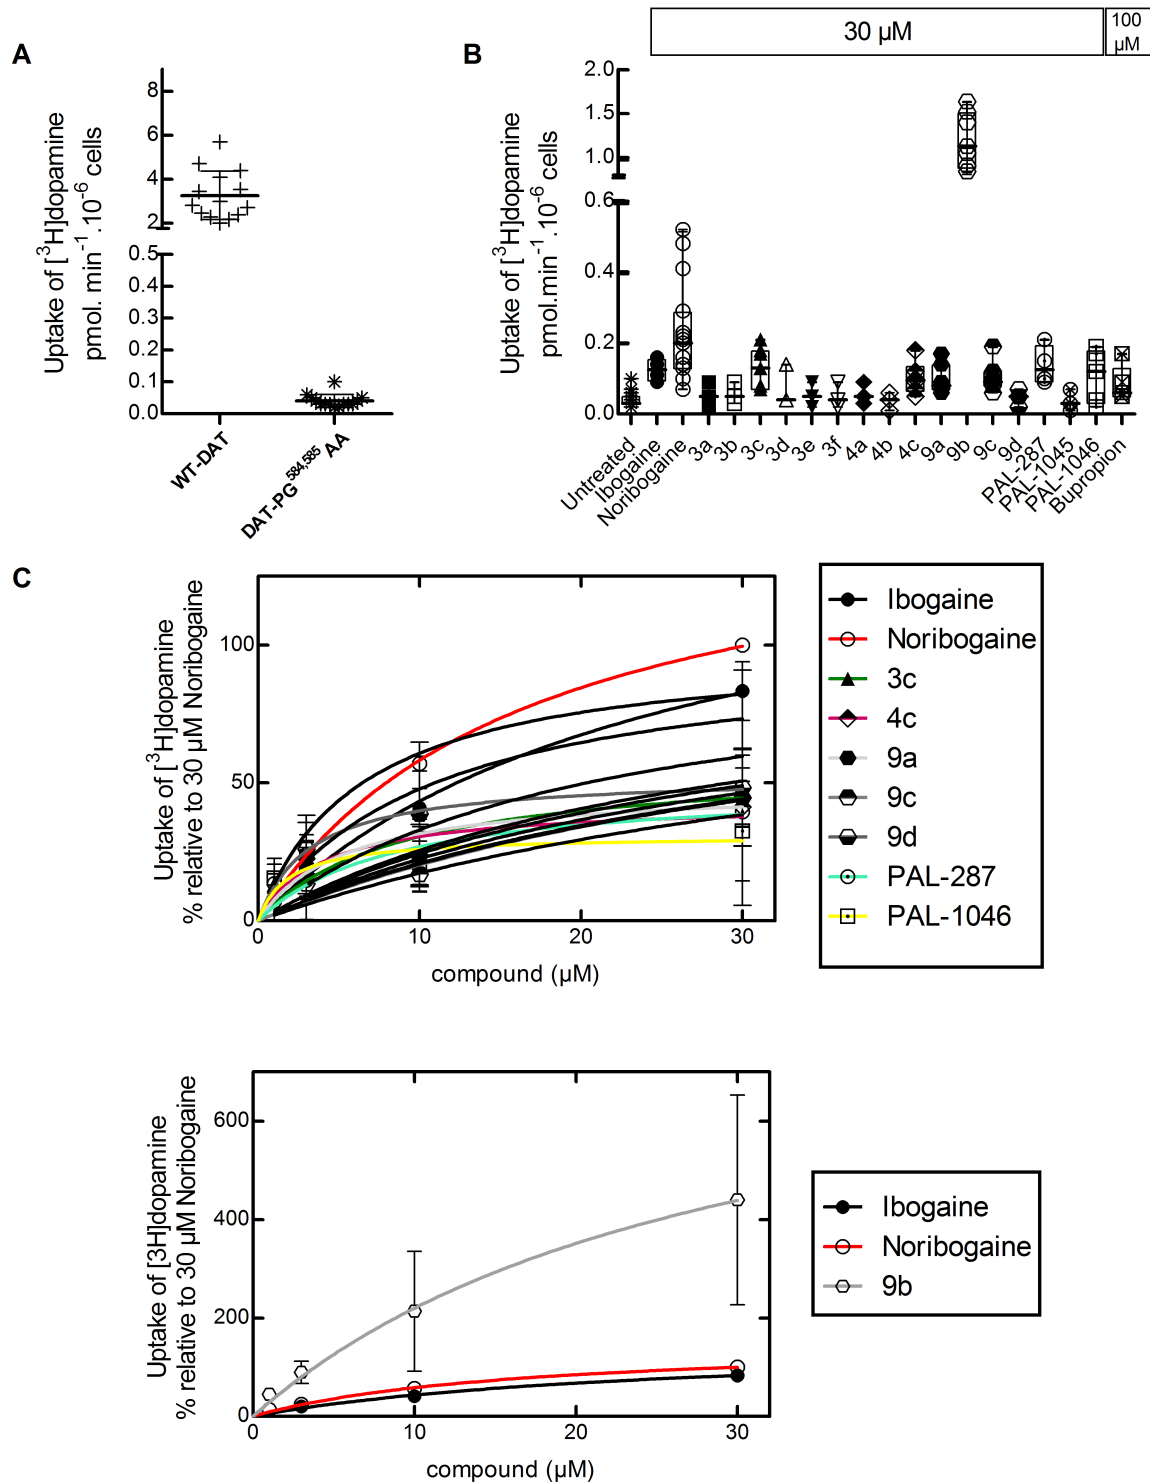

323  
 324 **Figure 3. [<sup>3</sup>H]Dopamine uptake in HEK293 cells expressing the hDAT-PG<sup>584,585</sup> AA after pre-**  
 325 **incubation with ibogaine analogs. A.** Comparison of [<sup>3</sup>H]DA uptake in HEK293 cells transiently  
 326 expressing wild type (WT) hDAT or hDAT-PG<sup>584,585</sup> AA. Each symbols represents the result from an  
 327 individual experiment (done in triplicate); means ± S.D. are also shown. **B.** hDAT-PG<sup>584,585</sup> AA  
 328 expressing cells were incubated in the presence of the indicated compounds (30 μM in all instances

329 but bupropion, 100  $\mu$ M). After 24 h, specific [ $^3$ H]dopamine uptake was determined as outlined  
330 under “Methods”. Values from individual experiments (done in triplicate) are shown as dots; box  
331 plots show the median and the interquartile range. **C.** (Top) Concentration-response curves for  
332 pharmacochaperoning by the indicated compounds (selected as positive hits from *panel B*). Rescued  
333 uptake was normalized to that achieved by 30  $\mu$ M noribogaine (=100%) to account for inter-  
334 experimental variations. Rescue by **9b** was plotted separately because of its very high efficacy in  
335 comparison to other analogs (*bottom*). The solid lines were drawn by fitting the data to the equation  
336 for a rectangular hyperbola (for EC<sub>50</sub> and E<sub>max</sub> of mutant rescue see **Table 1**). Data were obtained in at  
337 least three independent experiments carried out in triplicate. The error bars indicate S.D.

338  
339 and **9a**, **9c** and **9d** rescued the function of DAT-PG<sup>584,585</sup>AA to a modest extent. In contrast,  
340 compound **9b** was a very efficacious pharmacochaperone for DAT-PG<sup>584,585</sup>AA mutant with  
341 transport activity exceeding that restored by noribogaine by ~4-fold. Thus, after preincubation  
342 in the presence of compound **9b**, cells expressing DAT-PG<sup>584,585</sup>AA recovered up to ~40% of  
343 the uptake velocity seen in cells expressing wild type DAT (*cf.* **Figs. 3A & 3B**) and mature  
344 glycosylated protein accumulated to appreciable levels (lanes 5 and 6 in **Fig. 2D**). We  
345 selected compounds **3c**, **4c**, **9a–9d**, PAL-287 and PAL-1046 as positive hits. Cells transiently  
346 expressing DAT-PG<sup>584,585</sup>AA were preincubated with increasing concentrations of these  
347 compounds and substrate uptake was subsequently determined to obtain concentration-  
348 response curves for their pharmacochaperoning activity. When compared to the reference  
349 compounds ibogaine and noribogaine, compounds **3c**, **4c**, **9a**, **9c**, **9d**, PAL-287 and PAL-1046  
350 were all less efficacious, and the EC<sub>50</sub>-values of compounds **3c**, **4c**, **9a**, **9d** and PAL-1046  
351 were lower than those of ibogaine and noribogaine (**Fig. 3C**, upper panel). As predicted from  
352 the screening assays summarized in **Fig. 3B**, compound **9b** was substantially more efficacious  
353 than noribogaine or ibogaine, but the EC<sub>50</sub>-values of these three compounds were comparable  
354 (**Fig. 3C**, lower panel; **Table 1**).

355  
356 **Rescue of DAT-PG<sup>584,585</sup>AA in flies by *in vivo* pharmacochaperoning with the ibogaine**  
357 **analog 9b**

358 In drosophila, dopaminergic projections into the fan-shaped body are required to maintain a  
359 wake/sleep cycle (*Liu et al., 2012; Pimentel et al., 2016*). In the absence of functional DAT,  
360 flies are hyperactive and have abnormal sleep regulation. Accordingly, drosophilae, in which  
361 the endogenous DAT gene is disrupted, are referred to as *fumin* (i.e., Japanese for sleepless)  
362 flies (*Kume et al., 2005*). We previously verified that noribogaine was an effective

363 pharmacochaperone *in vivo* for some folding-deficient versions of DAT in flies: when  
364 expressed in dopaminergic neurons of *fumin* flies, folding-deficient mutants of human DAT  
365 were retained in the ER of the soma of PPL1 neurons but delivered to the axonal terminals of  
366 the fan-shaped body, if flies were administered noribogaine; concomitantly, sleep was  
367 restored (Kasture *et al.*, 2016; Asjad *et al.*, 2017). Accordingly, we tested compound **9b** to  
368 determine if it was also effective as a pharmacochaperone *in vivo*. We generated *fumin* flies,  
369 which harbored the human cDNA encoding DAT-PG<sup>584,585</sup>AA under the control of GAL4  
370 driven from a tyrosine hydroxylase promoter (Friggi-Grelin *et al.*, 2003). Adult flies were  
371 individually placed in transparent tubes, which contained the food pellet supplemented with  
372 designated concentrations of compound **9b** or of noribogaine, and allowed to recover for one  
373 day; they then spent an additional day of a 12h light/12h dark cycle (marked as yellow and  
374 black rectangle in **Fig. 4A**) to entrain their circadian rhythm. It is evident that, when  
375 subsequently released into a dark-dark cycle (marked as gray and black rectangle in **Fig. 4A**),  
376 these flies were as hyperactive as *fumin* flies (*cf.* green and red symbols in **Fig. 4A**). Their  
377 hyperactivity was greatly reduced by treatment of either compound **9b** or noribogaine at a  
378 concentration of 30 and 100  $\mu$ M, respectively, in the food pellet (*cf.* blue and orange symbols  
379 in **Fig. 4A**). In fact, both compound **9b** and noribogaine reduced the locomotor activity to that  
380 seen in the isogenic control line w1118. We quantified the effect of increasing doses of  
381 compound **9b** (administered by raising its concentration in the food pellet from 10 to 100  $\mu$ M)  
382 on sleep time (**Fig. 4B**): on average this increased in a dose-dependent manner by about 2.5-  
383 fold, i.e. from 300 min in the absence of any pharmacochaperone in the food pellet to 750 min  
384 with 100  $\mu$ M of compound **9b** in the food pellet. Sleep duration was comparable to that seen  
385 after administration of feed containing 100  $\mu$ M noribogaine and approached that seen in  
386 w1118 flies. This indicates that pharmacochaperoning by compound **9b** rescued DAT-  
387 PG<sup>584,585</sup>AA in amounts sufficient to restore clearance of dopamine from the synapse and to  
388 thus reinstate normal dopaminergic transmission. Finally, the effect of compound **9b** (and of  
389 noribogaine) was specific: sleep duration was neither affected by compound **9b** (or  
390 noribogaine) in w1118 flies harboring an intact DAT nor in DAT-deficient *fumin* flies (**Fig.**  
391 **4C**).

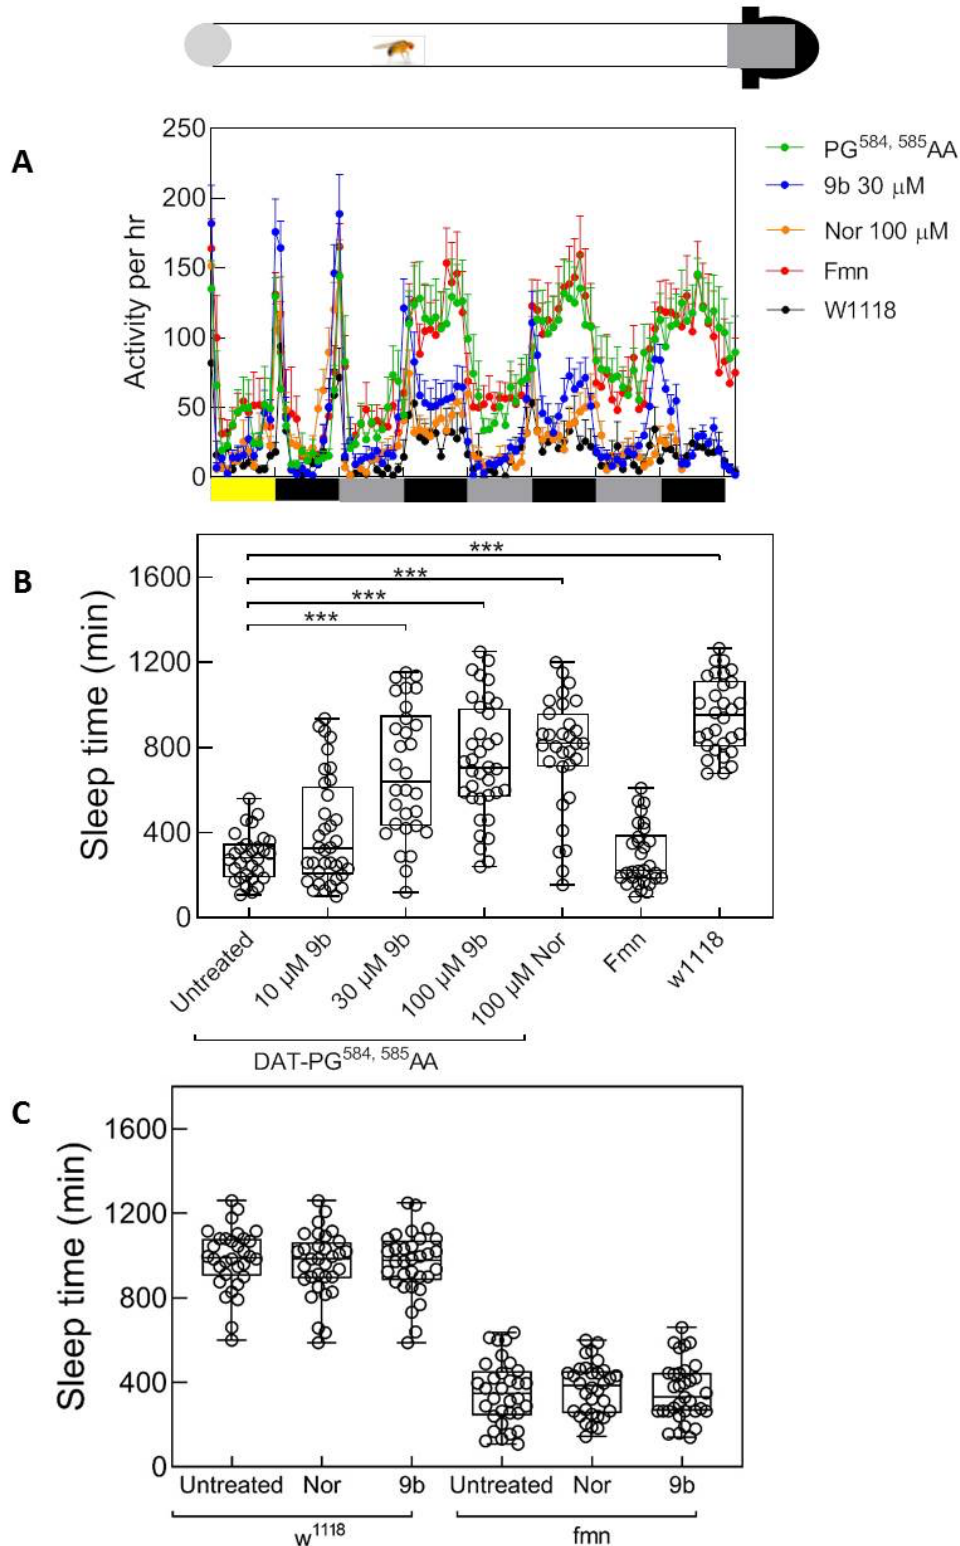

392  
393 **Figure 4. Pharmacochaperones restore sleep in flies harboring DAT-PG<sup>584,585</sup>AA.** **A.** Locomotor  
394 activity (measured over 1 min interval and binned into 60 min intervals) was recorded from day 2 to  
395 day 5 using a Drosophila activity monitor system (schematically represented above the graph, for  
396 details see Methods). The data are means ± SEM from three independent experiments, which were  
397 each carried out in parallel with at least 10 flies/condition. The diurnal light cycles (light-dark on day



398 2, and dark-dark on days 3- 5) are outlined schematically below the graph. **B.** and **C.**, sleep time of  
399 treated DAT-PG<sup>584,585</sup>AA mutant flies. Flies expressing hDAT-PG<sup>584,585</sup>AA in the *fumin* background were  
400 fed with food pellets containing the indicated concentrations of noribogaine and 9b. **C.** w1118 and  
401 *fumin* flies were used as control and were given food containing 100 μM noribogaine or 100 μM 9b.  
402 Locomotor activity on day 4 was used to quantify the sleep time using pySolo software. Empty circle  
403 represents individual flies. Statistical significance of the observed differences was determined by  
404 analysis of variance followed by Dunn's post-hoc test (\*\*\*, p < 0.001).

#### 405 406 **Pharmacochaperoning of folding-deficient DAT-mutants associated with human disease** 407 **by the ibogaine analog 9b**

408 The efficacy of compound **9b**, which was seen *in vivo*, is promising. We therefore examined  
409 the ability of compound **9b** to rescue all disease-relevant mutants of DAT. When  
410 heterologously expressed in HEK293 cells, measurable substrate influx was restored in six  
411 mutants (**Fig. 5**); in four of these mutants, i.e. DAT-G<sup>386</sup>R, -R<sup>521</sup>W, -P<sup>395</sup>L, and -P<sup>554</sup>L,  
412 compound **9b** was more efficacious than the reference compounds ibogaine and noribogaine.  
413 In contrast, preincubation in the presence of the corresponding deconstructed analogs **3c** and  
414 **4c** invariably failed to restore any transport activity. Compound **9b** did not rescue the function  
415 of DAT-R<sup>85</sup>L, -V<sup>158</sup>F, -L<sup>224</sup>P, -G<sup>327</sup>R, -L<sup>368</sup>Q, -Y<sup>470</sup>S and -P<sup>529</sup>L in any appreciable manner  
416 (data not shown).

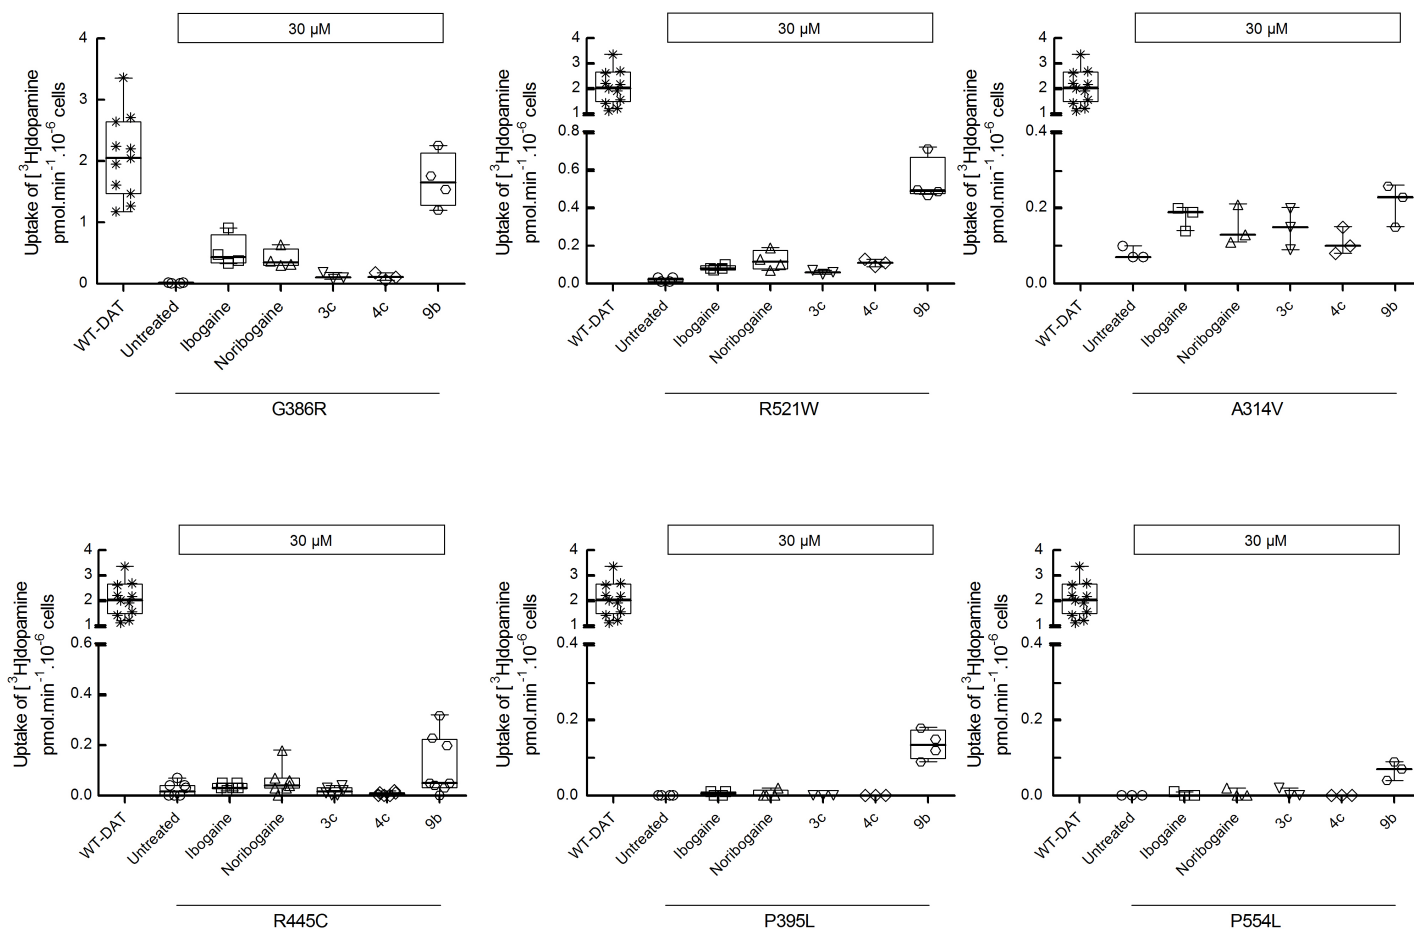

418 **Figure 5. Pharmacochaperoning of DTDS-associated DAT mutants by 9b.** HEK293 cells were  
 419 transiently transfected with plasmids encoding YFP-tagged wild-type hDAT or each of the 13 hDAT  
 420 mutants discovered in patients suffering from dopamine transporter deficiency syndrome (DTDS).  
 421 After 24 h, the cells were seeded onto 96-well plates for 24 h and were either incubated in the  
 422 absence (untreated) or presence of either of ibogaine, noribogaine or of the fluorinated ibogaine  
 423 analogs **3c**, **4c** and **9b** (all at 30 μM) for another 24 h. The cells were washed 4 times with Krebs-MES  
 424 buffer (pH 5.5) and once with Krebs-HEPES buffer (pH 7.4) to completely remove extracellular  
 425 reservoir of the compounds. Uptake of [<sup>3</sup>H]dopamine was subsequently measured as outlined under  
 426 “Material and Methods.” The mutants with positive pharmacochaperoning effect by **9b** are  
 427 represented in this figure. The data are represented as the individual values for at least three  
 428 independent experiments carried out in triplicate for wild-type hDAT and the DAT mutants, and as  
 429 box plots with the median and the interquartile range; whiskers indicate the 95% confidence interval.  
 430 WT-DAT uptake values were used as a control for transfection efficiency. Compound **9b** failed to  
 431 restore activity in the other DAT mutants (i.e. DAT-R<sup>85</sup>L, -V<sup>158</sup>F, -L<sup>224</sup>P, -G<sup>327</sup>R, -L<sup>368</sup>Q, -Y<sup>470</sup>S, and -P<sup>529</sup>L).  
 432  
 433

434

## 435 **Discussion**

436 More than sixty point mutations have been identified, which give rise to human disease,  
437 because they lead to misfolding of a member of the SLC6 transporter family (*Freissmuth et*  
438 *al., 2018*). Folding defects can be overcome by pharmacochaperones, which reduce energy  
439 barriers in the folding trajectory: stalled intermediates proceed to reach the native fold.  
440 Pharmacochaperoning by ibogaine was serendipitously discovered, when studying ER export  
441 of SERT (*El-Kasaby et al., 2010*). Ibogaine and its metabolite noribogaine effectively rescue  
442 some disease-relevant DAT mutants, but with limited efficacy (*Beerepoot et al., 2016; Asjad*  
443 *et al., 2017*). Progress is contingent on understanding the attributes, which account for the  
444 pharmacochaperoning action of ibogaine. Here, we relied on an orthogonal approach by  
445 interrogating the chemical space populated by variations of the ibogaine structure and by  
446 probing their effect on the folding space of SERT and DAT, using two analogous mutations  
447 and the disease-associated mutations of DAT. Our observations lead to the insight that affinity  
448 for the wild type transporter (i.e. the native folded state) and pharmacochaperoning activity  
449 are not tightly linked, as the structure-activity relationships differ. This conclusion is based on  
450 the following lines of evidence: the affinity for SERT is governed predominantly by  
451 substitution on the indole ring with structural rigidity playing a minor role (**Table 1**).  
452 Accordingly, hydroxy- (**3f**, **9d**) and fluoro- (**3c**, **4c**, **9b**) analogs had higher affinities for SERT  
453 than methoxy- and unsubstituted analogs, but **9d** had lower affinity for SERT than its more  
454 flexible analogue **3f**.

455

456 The substitution on the indole ring is less important a determinant for DAT affinity. The most  
457 important determinant for pharmacochaperoning efficacy is the structural rigidity imparted by  
458 the azepine ring, which is retained by ibogaine, noribogaine and compounds of the **9a–9d**  
459 series. In contrast, this rigidity is not required for supporting moderate to high-affinity binding  
460 to SERT and DAT. The fluorinated compounds **3c** and **4c**, for instance, were as potent as **9b**  
461 in inhibiting SERT, but they were substantially less efficacious and less potent in rescuing  
462 SERT-PG<sup>601,602</sup>AA. Similarly, these three analogs only differed modestly in their affinity for  
463 DAT, but only compound **9b** was an efficacious pharmacochaperone for DAT-PG<sup>584,585</sup>AA.  
464 In fact, compound **9b** meets three important criteria to be considered a significant advance in  
465 the pharmacochaperoning of DAT mutants: (i) the pharmacochaperoning efficacy of  
466 compound **9b** exceeded that of the parent compound noribogaine. (ii) Compound **9b** had a  
467 therapeutic window *in vivo*, i.e. there was an effective dose range, where it restored sleep in

468 *drosophilae* harboring DAT-PG<sup>584,585</sup>AA. This effect was specifically linked to the  
469 pharmacochaperoning action, because compound **9b** did not affect locomotion and sleep in  
470 control flies (harboring endogenous DAT) or *fumin* flies lacking DAT. (iii) Compound **9b**  
471 restored folding to disease-associated DAT mutants, which were unresponsive to noribogaine,  
472 thus doubling the number of DAT mutants potentially amenable to folding correction.

473  
474 The mechanistic basis underlying pharmacochaperoning is poorly understood. At least four  
475 mechanisms are conceivable, i.e. (i) stabilization of the native state or (ii) of a folding  
476 intermediate, (iii) prevention of aggregate formation or (iv) dissolution of aggregates  
477 (*Marinko et al., 2019*). Stabilization of the native state is posited to be the most common  
478 mechanism of action for pharmacochaperones. In this instance, chaperoning efficacy is related  
479 to binding affinity (*Marinko et al., 2019*). Our observations are difficult to reconcile with  
480 binding to the native state, because (i) the structure-activity relationships for binding to the  
481 wild type transporters - i.e. the native state - differed substantially from for  
482 pharmacochaperoning. (ii) The EC<sub>50</sub>-values for rescuing DAT-PG<sup>584,585</sup>AA and SERT-  
483 PG<sup>601,602</sup>AA differed by 400-fold. This difference was substantially larger than variation in  
484 affinity for the native state of SERT and DAT. This indicates that compound **9b** has a high  
485 and low affinity for the relevant folding intermediate(s) of SERT-PG<sup>601,602</sup>AA and of DAT-  
486 PG<sup>584,585</sup>AA, respectively. (iii) The relative pharmacochaperoning efficacy of ibogaine,  
487 noribogaine and compound **9b** was highly dependent on the nature of the DAT mutant: in  
488 DAT-PG<sup>584,585</sup>AA and in several disease-relevant DAT mutants (i.e., DAT-G<sup>386</sup>R, -R<sup>521</sup>W, -  
489 P<sup>395</sup>L, P<sup>554</sup>L) compound **9b** was substantially more efficacious than ibogaine and noribogaine,  
490 but this was not the case in DAT-A<sup>314</sup>V and DAT-R<sup>445</sup>C. This variation in relative efficacy is  
491 again difficult to reconcile with stabilization of the native state. (iv) Circumstantial evidence  
492 also argues that the other two proposed mechanisms of pharmacochaperoning - inhibition of  
493 aggregation and disassembly of aggregates - do not apply: diseases arising from mutations in  
494 SLC6 transporter can be transmitted in both a recessive and a dominant fashion. Because  
495 SLC6 transporters are exported from the ER in an oligomeric form, folding-deficient mutants  
496 can act in a dominant-negative manner and retain the wild type transporter (*Chiba et al.,*  
497 *2014; Lopez-Corcuera et al., 2019*). However, all disease-relevant human DAT mutants are  
498 transmitted as recessive alleles (*Kurian et al., 2011; Ng et al., 2014*). Thus, their folding  
499 trajectory is stalled at a stage, where they are complexed with and shielded by ER chaperones  
500 such as calnexin, which precludes oligomerization (*Korkhov et al., 2008*). Taken together,

501 these observations indicate that binding to folding intermediate(s) is the most likely  
502 mechanism underlying the pharmacochaperoning action of compound **9b**.

503  
504 Individual folding-deficient mutants of SERT and DAT are stalled at different points of their  
505 folding trajectory and differ in their susceptibility to pharmacochaperoning (*El-Kasaby et al.*,  
506 2014; *Koban et al.*, 2015; *Beerepoot et al.*, 2016; *Asjad et al.*, 2017; *Freissmuth et al.*, 2017).  
507 Our approach relied on using the two analogous folding deficient mutants SERT-PG<sup>601,602</sup>AA  
508 and DAT-PG<sup>584,585</sup>AA by assuming that these two proteins are stalled at related positions of  
509 their folding trajectory. However, compound **9b** was more than 100-fold more potent in  
510 rescuing SERT-PG<sup>601,602</sup>AA than DAT-PG<sup>584,585</sup>AA. A similar discrepancy was seen in the  
511 naphthylamine series of pharmacochaperones (*Bhat et al.*, 2017): PAL-287 was more  
512 effective than PAL-1045 in rescuing DAT-PG<sup>584,585</sup>AA, the reverse was true for SERT-  
513 PG<sup>601,602</sup>AA (cf. **Fig. 3** and *Bhat et al.*, 2017). Taken together, these observations are again  
514 consistent with the conjecture that the compounds act as pharmacochaperones by binding to  
515 folding intermediates rather than by stabilizing the native state. The hypothetical model posits  
516 that, in the folding trajectory of wild type SLC6 transporters, there is a large isoenergetic  
517 conformational search space. Mutations convert this smooth surface into a rugged landscape.  
518 Accordingly, they create multiple traps, which reside at different locations in the peripheral  
519 ring of the champagne glass-like energy landscape (*Dill and Chan*, 1997). Some of these traps  
520 can be overcome by pharmacochaperoning, but they differ - even for closely related folding-  
521 deficient mutations - in their position in the conformational search space (*El-Kasaby et al.*,  
522 2014). Hence, the folding intermediates in the vicinity of the trap(s) differ in their ability to  
523 bind to and respond to a pharmacochaperoning ligand. General rules, which govern folding of  
524 helical membrane proteins, have been inferred but the details are obscure (*Chiba et al.*, 2014;  
525 *Marinko et al.*, 2019). Progress is hampered, because the nature of the folding intermediate(s)  
526 is poorly understood. The affinity of compound **9b** for the folding intermediate(s) of SERT-  
527 PG<sup>601,602</sup>AA was estimated to be in the submicromolar range. Hence, compound **9b** may be  
528 useful as a starting point to develop probes to address the folding trajectory of SERT-  
529 PG<sup>601,602</sup>AA and other misfolded SERT variants. We anticipate that the resulting insights will  
530 also advance the search for additional pharmacochaperones. These are needed, because the  
531 majority of disease-associated DAT mutants are still not remedied by the available  
532 pharmacochaperones. Moreover, compound **9b** is a significant breakthrough, because it not  
533 only expands the number of rescued DAT mutants but it also restores the functional activity  
534 of DAT-G386R essentially to wild type levels. Thus, compound **9b** provides a proof-of-

535 principle that it is possible to fully correct the folding defect of a mutant by  
536 pharmacochaperoning.

537

538

## 539 **References**

540 **Asjad HMM**, Kasture A, El-Kasaby A, Sackel M, Hummel T, Freissmuth M, Sucic S. 2017.  
541 Pharmacochaperoning in a Drosophila model system rescues human dopamine transporter  
542 variants associated with infantile/juvenile parkinsonism. *Journal of Biological Chemistry*  
543 **292**:19250-19265. doi: 10.1074/jbc.M117.797092, PMID: 28972153

544 **Beerepoot P**, Lam VM, Salahpour A. 2016. Pharmacological chaperones of the dopamine  
545 transporter rescue dopamine transporter deficiency syndrome mutations in heterologous cells.  
546 *Journal of Biological Chemistry* **291**:22053-22062. doi: 10.1074/jbc.M116.749119, PMID:  
547 27555326

548 **Bhat S**, Hasenhuetl PS, Kasture A, El-Kasaby A, Baumann MH, Blough BE, Sucic S,  
549 Sandtner W, Freissmuth M. 2017. Conformational state interactions provide clues to the  
550 pharmacochaperone potential of serotonin transporter partial substrates. *Journal of Biological*  
551 *Chemistry* **292**:16773-16786. doi: 10.1074/jbc.M117.794081, PMID: 28842491

552 **Bhat S**, Newman AH, Freissmuth M. 2019. How to rescue misfolded SERT, DAT and NET:  
553 targeting conformational intermediates with atypical inhibitors and partial releasers.  
554 *Biochemical Society Transactions* **47**:861-874. doi: 10.1042/BST20180512, PMID: 31064865

555 **Blackburn J**, Szumlinski KK. 1997. Ibogaine effects on sweet preference and amphetamine  
556 induced locomotion: implications for drug addiction. *Behavioural Brain Research* **89**:99-106.  
557 doi: 10.1016/s0166-4328(97)00050-8, PMID: 9475618

558 **Brown TK**, Alper K. 2018. Treatment of opioid use disorder with ibogaine: detoxification  
559 and drug use outcomes. *The American Journal of Drug and Alcohol Abuse* **44**:24-36. doi:  
560 10.1080/00952990.2017.1320802, PMID: 28541119

561 **Bulling S**, Schicker K, Zhang YW, Steinkellner T, Stockner T, Gruber CW, Boehm S,  
562 Freissmuth M, Rudnick G, Sitte HH, Sandtner W. 2012. The Mechanistic basis for  
563 noncompetitive ibogaine inhibition of serotonin and dopamine Transporters. *Journal of*  
564 *Biological Chemistry* **287**:18524-18534. doi: 10.1074/jbc.M112.343681, PMID: 22451652

565 **Burtscher V**, Hotka M, Li Y, Freissmuth M, Sandtner W. 2018. A label-free approach to  
566 detect ligand binding to cell surface proteins in real time. *eLife* **7**:e34944. doi:  
567 10.7554/eLife.34944, PMID: 29697048

- 568 **Chiba P**, Freissmuth M, Stockner T. 2014. Defining the blanks--pharmacochaperoning of  
569 SLC6 transporters and ABC transporters. *Pharmacological Research* **83**:63-73. doi:  
570 10.1016/j.phrs.2013.11.009, PMID: 24316454
- 571 **Coleman JA**, Yang D, Zhao Z, Wen PC, Yoshioka C, Tajkhorshid E, Gouaux E. 2019.  
572 Serotonin transporter-ibogaine complexes illuminate mechanisms of inhibition and transport.  
573 *Nature* **569**:141-145. doi: 10.1038/s41586-019-1135-1, PMID: 31019304
- 574 **Corkery JM**. 2018. Ibogaine as a treatment for substance misuse: Potential benefits and  
575 practical dangers. *Progress in Brain Research* **242**:217-257. doi: 10.1016/bs.pbr.2018.08.005,  
576 PMID: 30471681
- 577 **Dill KA**, Chan HS 1997. From Levinthal to pathways to funnels. *Nature Structural Biology* **4**:  
578 10–19. doi: 10.1038/nsb0197-10, PMID: 8989315
- 579 **Dybowski J**, Landrin E. 1901. PLANT CHEMISTRY. Concerning Iboga, its excitement-  
580 producing properties, its composition, and the new alkaloid it contains, ibogaine. *Comptes*  
581 *rendus de l'Académie des Sciences* **133**:748.
- 582 **El-Kasaby A**, Just H, Malle E, Stolt-Bergner PC, Sitte HH, Freissmuth M, Kudlacek O. 2010.  
583 Mutations in the carboxyl-terminal SEC24 binding motif of the serotonin transporter impair  
584 folding of the transporter. *Journal of Biological Chemistry* **285**:39201-39210. doi:  
585 10.1074/jbc.M110.118000, PMID: 20889976
- 586 **El-Kasaby A**, Koban F, Sitte HH, Freissmuth M, Sucic S. 2014. A cytosolic relay of heat  
587 shock proteins HSP70-1A and HSP90 $\beta$  monitors the folding trajectory of the serotonin  
588 transporter. *Journal of Biological Chemistry* **289**:28987-29000. doi:  
589 10.1074/jbc.M114.595090, PMID: 25202009
- 590 **Freissmuth M**, Stockner T, Sucic S. 2018. SLC6 Transporter Folding Diseases and  
591 Pharmacochaperoning. *Handbook of Experimental Pharmacology* **245**: 249-270. doi:  
592 10.1007/164\_2017\_71, PMID: 29086036
- 593 **Friggi-Grelin F**, Coulom H, Meller M, Gomez D, Hirsh J, Birman S. 2003. Targeted gene  
594 expression in Drosophila dopaminergic cells using regulatory sequences from tyrosine  
595 hydroxylase. *Journal of Neurobiology* **54**:618-627. doi: 10.1002/neu.10185, PMID: 12555273
- 596 **Gassaway MM**, Jacques TL, Kruegel AC, Karpowicz RJ Jr, Li X, Li S, Myer Y, Sames D.  
597 2016. Deconstructing the Iboga Alkaloid Skeleton: Potentiation of FGF2-induced Glial Cell  
598 Line-Derived Neurotrophic Factor Release by a Novel Compound. *ACS Chemical Biology*  
599 **11**:77-87. doi: 10.1021/acscchembio.5b00678, PMID: 26517751
- 600 **Gilestro GF**, Cirelli C. 2009. pySolo: a complete suite for sleep analysis in Drosophila.  
601 *Bioinformatics* **25**: 1466–1467. doi: 10.1093/bioinformatics/btp237, PMID: 19369499

- 602 **Glick SD**, Rossman K, Steindorf S, Maisonneuve IM, Carlson JN. 1991. Effects and after  
603 effects of ibogaine on morphine self-administration in rats. *European Journal of*  
604 *Pharmacology* **195**: 341-345. doi: 10.1016/0014-2999(91)90474-5, PMID: 1868880
- 605 **Glick SD**, Kuehne ME, Raucci J, Wilson TE, Larson D, Keller RW Jr, Carlson JN. 1994.  
606 Effects of iboga alkaloids on morphine and cocaine self-administration in rats: relationship to  
607 tremorigenic effects and to effects on dopamine release in nucleus accumbens and striatum.  
608 *Brain Research* **657**:14-22. doi: 10.1016/0006-8993(94)90948-2, PMID: 7820611
- 609 **Hasenhuetl PS**, Bhat S, Freissmuth M, Sandtner W. 2019. Functional selectivity and partial  
610 efficacy at the monoamine transporters: a unified model of allosteric modulation and  
611 amphetamine-induced substrate release. *Molecular Pharmacology* **95**:303-312. doi:  
612 10.1124/mol.118.114793, PMID: 30567955
- 613 **Hohenegger M**, Mitterauer T, Voss T, Nanoff C, Freissmuth M. 1996. Thiophosphorylation  
614 of the G protein  $\beta$ -subunit in human platelet membranes: evidence against a direct phosphate  
615 transfer reaction to G $\alpha$ -subunits. *Molecular Pharmacology* **49**:73-80. PMID: 8569715
- 616 **Jacobs MT**, Zhang YW, Campbell SD, Rudnick G. 2007. Ibogaine, a noncompetitive  
617 inhibitor of serotonin transport, acts by stabilizing the cytoplasm-facing state of the  
618 transporter. *Journal of Biological Chemistry* **282**:29441-29447. doi:  
619 10.1074/jbc.M704456200, PMID: 17698848
- 620 **Kasture A**, El-Kasaby A, Szöllösi D, Asjad HMM, Grimm A, Stockner T, Freissmuth M,  
621 Sucic S. 2016. Functional rescue of a misfolded *Drosophila melanogaster* dopamine  
622 transporter mutant associated with a sleepless phenotype by pharmacological chaperones.  
623 *Journal of Biological Chemistry* **291**:20876-20890. doi: 10.1074/jbc.M116.737551, PMID:  
624 27481941
- 625 **Koban F**, El-Kasaby A, Häusler C, Stockner T, Simbrunner BM, Sitte, HH, Freissmuth M,  
626 Sucic S. 2015. A salt bridge linking the first intracellular loop with the C terminus facilitates  
627 the folding of the serotonin transporter. *Journal of Biological Chemistry* **290**:13263-13278.  
628 doi: 10.1074/jbc.M115.641357, PMID: 25869136
- 629 **Korkhov VM**, Milan-Lobo L, Zuber B, Farhan H, Schmid JA, Freissmuth M, Sitte HH. 2008.  
630 Peptide-based interactions with calnexin target misassembled membrane proteins into  
631 endoplasmic reticulum-derived multilamellar bodies. *Journal of Molecular Biology* **378**:337-  
632 352. doi: 10.1016/j.jmb.2008.02.056, PMID: 18367207
- 633 **Kristensen AS**, Andersen J, Jørgensen TN, Sørensen L, Eriksen J, Loland CJ, Strømgaard K,  
634 Gether U. 2011. SLC6 neurotransmitter transporters: structure, function, and regulation.  
635 *Pharmacological Review* **63**:585-640. doi: 10.1124/pr.108.000869, PMID: 21752877



- 636 **Kruegel AC**, Rakshit S, Li X, Sames D. 2015. Constructing Iboga alkaloids via C–H bond  
637 functionalization: examination of the direct and catalytic union of heteroarenes and  
638 isoquinuclidine alkenes. *The Journal of Organic Chemistry* **80**:2062-2071. doi:  
639 10.1021/jo5018102, PMID: 25633249
- 640 **Kume K**, Kume S, Park SK, Hirsh J, Jackson FR. 2005. Dopamine is a regulator of arousal in  
641 the fruit fly. *The Journal of Neuroscience* **25**:7377–7384. doi: 10.1523/JNEUROSCI.2048-  
642 05.2005, PMID: 16093388
- 643 **Kurian MA**, Li Y, Zhen J, Meyer E, Hai N, Christen HJ, Hoffmann GF, Jardine P, von  
644 Moers A, Mordekar SR, O'Callaghan F, Wassmer E, Wraige E, Dietrich C, Lewis T, Hyland  
645 K, Heales S Jr, Sanger T, Gissen P, Assmann BE, Reith ME, Maher ER. 2011. Clinical and  
646 molecular characterisation of hereditary dopamine transporter deficiency syndrome: an  
647 observational cohort and experimental study. *The Lancet Neurology* **10**:54-62. doi:  
648 10.1016/S1474-4422(10)70269-6, PMID: 21112253
- 649 **Liu Q**, Liu S, Kodama L, Driscoll MR, Wu MN. 2012. Two dopaminergic neurons signal to  
650 the dorsal fan-shaped body to promote wakefulness in *Drosophila*. *Current Biology* **22**:2114-  
651 2123. doi: 10.1016/j.cub.2012.09.008, PMID: 23022067
- 652 **López-Corcuera B**, Arribas-González E, Aragón C. 2019. Hyperekplexia-associated  
653 mutations in the neuronal glycine transporter 2. *Neurochemistry International* **123**:95-100.  
654 doi: 10.1016/j.neuint.2018.05.014, PMID: 29859229
- 655 **Marinko JT**, Huang H, Penn WD, Capra JA, Schleich JP, Sanders CR 2019. Folding and  
656 Misfolding of Human Membrane Proteins in Health and Disease: from single molecules to  
657 Cellular proteostasis. *Chemical Reviews* **119**:5537-5606. doi: 10.1021/acs.chemrev.8b00532,  
658 PMID: 30608666
- 659 **Mash DC**, Staley JK, Baumann MH, Rothman RB, Hearn WL. 1995. Identification of a  
660 primary metabolite of ibogaine that targets serotonin transporters and elevates serotonin. *Life*  
661 *Sciences* **157**:45-50. doi: 10.1016/0024-3205(95)00273-9, PMID: 7596224
- 662 **Miranda M**, Sorkina T, Grammatopoulos TN, Zawada WM, Sorkin A. 2004. Multiple  
663 molecular determinants in the carboxyl terminus regulate dopamine transporter export from  
664 endoplasmic reticulum. *Journal of Biological Chemistry* **279**:30760-30770. doi:  
665 10.1074/jbc.M312774200, PMID: 15128747
- 666 **Ng J**, Zhen J, Meyer E, Erreger K, Li Y, Kakar N, Ahmad J, Thiele H, Kubisch C, Rider NL,  
667 Morton DH, Strauss KA, Puffenberger EG, D'Agnano D, Anikster Y, Carducci C, Hyland K,  
668 Rotstein M, Leuzzi V, Borck G, Reith ME, Kurian MA. 2014. Dopamine transporter

- 669 deficiency syndrome: phenotypic spectrum from infancy to adulthood. *Brain* **137**:1107-1119.  
670 doi: 10.1093/brain/awu022, PMID: 24613933
- 671 **Noller GE**, Frampton CM, Yazar-Klosinski B. 2018. Ibogaine treatment outcomes for opioid  
672 dependence from a twelve-month follow-up observational study. *The American Journal of*  
673 *Drug and Alcohol Abuse* **44**:37-46. doi: 10.1080/00952990.2017.1310218, PMID: 28402682
- 674 **Pimentel D**, Donlea JM, Talbot CB, Song SM, Thurston AJF, Miesenböck G. 2016.  
675 Operation of a homeostatic sleep switch. *Nature* **536**: 333–337. doi: 10.1038/nature19055,  
676 PMID: 27487216
- 677 **Reith ME**, Blough BE, Hong WC, Jones KT, Schmitt KC, Baumann MH, Partilla JS,  
678 Rothman RB, Katz JL. 2015. Behavioral, Biological, and Chemical Perspectives on Atypical  
679 Agents Targeting the Dopamine Transporter. *Drug and Alcohol Dependence* **147**:1-19. doi:  
680 10.1016/j.drugalcdep.2014.12.005, PMID: 25548026
- 681 **Rothman RB**, Partilla JS, Baumann MH, Lightfoot-Siordia C, Blough BE. 2012. Studies of  
682 the biogenic amine transporters. 14. Identification of low-efficacy "partial" substrates for the  
683 biogenic amine transporters. *The Journal of Pharmacology and Experimental Therapeutics*  
684 **341**:251-62. doi: 10.1124/jpet.111.188946, PMID: 22271821
- 685 **Schmitt KC**, Rothman RB, Reith ME. 2013. Nonclassical pharmacology of the dopamine  
686 transporter: atypical inhibitors, allosteric modulators and partial substrates. *The Journal of*  
687 *Pharmacology and Experimental Therapeutics* **346**: 2-10. doi: 10.1124/jpet.111.191056,  
688 PMID: 23568856
- 689 **Sitte HH**, Freissmuth M. 2015. Amphetamines, new psychoactive drugs and the monoamine  
690 transporter cycle. *Trends in Pharmacological Sciences* **36**:41-50. doi:  
691 10.1016/j.tips.2014.11.006, PMID: 25542076
- 692 **Sweetnam PM**, Lancaster J, Snowman A, Collins JL, Perschke S, Bauer C, Ferkany J. 1995.  
693 Receptor binding profile suggests multiple mechanisms of action are responsible for  
694 ibogaine's putative anti-addictive activity. *Psychopharmacology (Berl)* **1118**:369-376. doi:  
695 10.1007/BF02245936, PMID: 7568622
- 696 **Trost BM**, Godleski SA, Genet JP. 1978. A total synthesis of racemic and optically active  
697 ibogamine. Utilization and mechanism of a new silver ion assisted palladium catalyzed  
698 cyclization. *Journal of the American Chemical Society* **100**:3930-3931.  
699 doi.org/10.1021/ja00480a047
- 700 **Wasko MJ**, Witt-Enderby PA, Surratt CK. 2018. DARK classics in chemical neuroscience:  
701 Ibogaine. *ACS Chemical Neuroscience*. **9**:2475-2483. doi: 10.1021/acscchemneuro.8b00294,  
702 PMID: 30216039

703

704

705

706

707

708

709

## 710 **Material and Methods**

711

### 712 **Cell culture and materials**

713 Cells were propagated Dulbecco's Modified Eagle Medium (DMEM) supplemented with 10%  
714 heat-inactivated fetal bovine serum (FBS), 100 u·100 mL<sup>-1</sup> penicillin and 100 u·100 mL<sup>-1</sup>  
715 streptomycin. Medium used in the maintenance of stable lines (see below) was, in addition,  
716 supplemented with 50 µg ml<sup>-1</sup> geneticin (G418) for selection. HEK293 cells were transfected  
717 by combining plasmid DNA with PEI (linear 25 kDa polyethylenimine; Santa Cruz, SC-  
718 360988A) at a ratio of 1:3 (w:w) in serum-free DMEM. The plasmids encoding YFP-tagged  
719 human wild type and mutant versions of SERT (El-Kasaby et al., 2014) and of DAT (Kasture  
720 et al.,2016; Asjad et al., 2017) were previously described; YFP-tagged DAT-PG<sup>584,585</sup>AA was  
721 created by introducing the substitutions with created with the QuikChange Lightning Site-  
722 Directed Mutagenesis Kit (Stratagene, La Jolla, CA), using wild type YFP-fagged DAT as the  
723 template. The mutations were confirmed by automatic DNA sequencing (LGC Labor GmbH  
724 Augsburg, Germany). For the pharmacochaperoning experiments, noribogaine was purchased  
725 from Cfm Oskar Tropitzsch GmbH (Marktredwitz, Germany). [<sup>3</sup>H]5-HT (serotonin, 41.3  
726 Ci/mmol), and [<sup>3</sup>H]dopamine (DA, 39.6 Ci/mmol) were purchased from PerkinElmer Life  
727 Sciences. Scintillation mixture (Rotiszint® eco plus) was purchased from Carl Roth GmbH  
728 (Karlsruhe, Germany). Cell culture media and antibiotics were obtained from Sigma and  
729 Invitrogen, respectively. Anti-GFP antibody (rabbit, ab290) was from Abcam (Cambridge,  
730 UK). An antibody raised against an N-terminal peptide of the G protein β subunit was used to  
731 verify comparable loading of lanes (Hohenegger et al., 1996). Horseradish peroxidase–linked  
732 anti-rabbit IgG1 antibody was purchased from Amersham Biosciences. All other chemicals  
733 were of analytical grade.

734

### 735 **Radioligand Binding Studies**

736 For DAT binding assays, frozen striata, previously dissected from freshly harvested male  
737 Sprague–Dawley rat brains (supplied on ice by Bioreclamation, Hicksville, NY), were  
738 homogenized in 20 volumes (w/v) of ice-cold modified sucrose phosphate buffer (0.32 M  
739 sucrose, 7.74 mM Na<sub>2</sub>HPO<sub>4</sub>, and 2.26 mM NaH<sub>2</sub>PO<sub>4</sub>, pH adjusted to 7.4) using a Brinkman  
740 Polytron (Setting 6 for 20 s) and centrifuged at 48,400 x g for 10 min at 4°C. The resulting  
741 pellet was washed by resuspension in buffer, the suspension was centrifuged again, and the  
742 final pellet resuspended in ice-cold buffer to a concentration of 20 mg/mL (original wet  
743 weight/volume, OWW/V). Experiments were conducted in 96-well polypropylene plates

744 containing 50  $\mu$ L of various concentrations of the inhibitor, diluted using 30% DMSO  
745 vehicle, 300  $\mu$ L of sucrose phosphate buffer, 50  $\mu$ L of [ $^3$ H]WIN 35,428 (final concentration  
746 1.5 nM;  $K_D = 28.2$  nM; PerkinElmer Life Sciences, Waltham, MA), and 100  $\mu$ L of tissue (2.0  
747 mg/well OWW). All compound dilutions were tested in triplicate and the competition  
748 reactions started with the addition of tissue, and the plates were incubated for 120 min at 0-  
749 4°C. Nonspecific binding was determined using 10  $\mu$ M indatraline.

750 For SERT binding assays, frozen brain stem tissue, previously dissected from freshly  
751 harvested male Sprague–Dawley rat brains (supplied on ice by Bioreclamation, Hicksville,  
752 NY), was homogenized in 20 volumes (w/v) of 50 mM Tris buffer (120 mM NaCl and 5 mM  
753 KCl, adjusted to pH 7.4) at 25°C using a Brinkman Polytron (at setting 6 for 20 s) and  
754 centrifuged at 48,400 x g for 10 min at 4°C. The resulting pellet was resuspended in buffer,  
755 the suspension was centrifuged, and the final pellet suspended in buffer again to a  
756 concentration of 20 mg/mL (OWW/V). Experiments were conducted in 96-well  
757 polypropylene plates containing 50  $\mu$ L of various concentrations of the inhibitor, diluted  
758 using 30% DMSO vehicle, 300  $\mu$ L of Tris buffer, 50  $\mu$ L of [ $^3$ H]citalopram (final  
759 concentration 1.5 nM;  $K_d = 6.91$  nM; PerkinElmer Life Sciences, Waltham, MA), and 100  $\mu$ L  
760 of tissue (2.0 mg/well OWW). All compound dilutions were tested in triplicate and the  
761 competition reactions started with the addition of tissue, and the plates were incubated for 60  
762 min at rt. Nonspecific binding was determined using 10  $\mu$ M fluoxetine.

763 For all binding assays, incubations were terminated by rapid filtration through Perkin Elmer  
764 Uni-Filter-96 GF/B presoaked in either 0.3% (SERT) or 0.05% (DAT) polyethylenimine,  
765 using a Brandel 96-well harvester manifold or Brandel R48 filtering manifold (Brandel  
766 Instruments, Gaithersburg, MD). The filters were washed a total of 3 times with 3 mL ( $3 \times 1$   
767 mL/well or  $3 \times 1$  mL/tube) of ice cold binding buffer. Perkin Elmer MicroScint 20  
768 Scintillation Cocktail (65  $\mu$ L) was added to each filter well. Radioactivity was counted in a  
769 Perkin Elmer MicroBeta Microplate Counter.  $IC_{50}$  values for each compound were  
770 determined from inhibition curves and  $K_i$  values were calculated using the Cheng-Prusoff  
771 equation. When a complete inhibition could not be achieved at the highest tested  
772 concentrations,  $K_i$  values were estimated by extrapolation after constraining the bottom of the  
773 dose-response curves (= 0% residual specific binding) in the non-linear regression analysis.  
774 These analyses were performed using GraphPad Prism version 8.00 for Macintosh (GraphPad  
775 Software, San Diego, CA).  $K_d$  values for the radioligands were determined via separate  
776 homologous competitive binding or radioligand binding saturation experiments.  $K_i$  values

777 were determined from at least 3 independent experiments performed in triplicate and are  
778 reported as means  $\pm$  S.D.

779

### 780 **[<sup>3</sup>H]5-HT and [<sup>3</sup>H]dopamine uptake assays**

781 For uptake inhibition assays, HEK293 cells stably expressing either wild-type human YFP-  
782 tagged hSERT or YFP-tagged hDAT were seeded on poly-D-lysine-coated 96-well plates at a  
783 density of  $\sim$ 20,000 cells/well. After 24 h, the medium in each well was aspirated and the cells  
784 were washed once with Krebs-HEPES buffer (10 mM HEPES.NaOH, pH 7.4, 120 mM NaCl,  
785 3 mM KCl, 2 mM CaCl<sub>2</sub>, 2 mM MgCl<sub>2</sub>, and 2 mM glucose). Cells were pre-incubated in  
786 buffer containing logarithmically spaced concentrations (0.003–300  $\mu$ M) of ibogaine analogs  
787 for 10 minutes. Subsequently the reaction was started by by addition of substrate (0.4  $\mu$ M of  
788 either [<sup>3</sup>H]5-HT or [<sup>3</sup>H]dopamine) at constant concentrations of ibogaine analogs for 1  
789 minute. The reaction was terminated by aspirating the reaction medium followed by a wash  
790 with ice-cold buffer. The cells were lysed with 1% SDS and the released radioactivity was  
791 quantified by liquid scintillation counting.

792 For uptake assays determining functional rescue of mutant transporters, HEK293 cells were  
793 transfected with either YFP-tagged SERT-PG<sup>601,602</sup>AA or YFP-tagged DAT-PG<sup>584,585</sup>AA  
794 plasmids. Transfected cells were seeded on poly-D-lysine-coated 96-well plates at a density of  
795  $\sim$ 60-80,000 cells/well either in the absence or presence of increasing concentrations (0.1 –  
796 100  $\mu$ M) of the ibogaine analogs. After 24 h, the cells were washed four times with Krebs-  
797 MES buffer (10 mM 2-(N-morpholino)ethanesulfonic acid, pH 5.5, 120 mM NaCl, 3 mM  
798 KCl, 2 mM CaCl<sub>2</sub>, 2 mM MgCl<sub>2</sub>, and 2 mM glucose) in a 10 min interval and once with  
799 Krebs-HEPES (pH 7.4) buffer. The cells were subsequently incubated with 0.2  $\mu$ M of [<sup>3</sup>H]5-  
800 HT for 1 minute or [<sup>3</sup>H]dopamine for 5 min. and processed as outlined above.

801

### 802 **Immunoblotting after pharmacochaperoning of SERT-PG<sup>601,602</sup>AA or DAT-PG<sup>584,585</sup>AA**

803 HEK293 cells were transiently transfected with plasmids encoding either wild type SERT,  
804 SERT-PG<sup>601,602</sup>AA, wild type DAT or DAT-PG<sup>584,585</sup>AA. Approximately  $1.5 - 2 \times 10^6$  of  
805 these transfected cells were seeded either in 6-well plates or 6 cm dishes in the presence of 30  
806  $\mu$ M of the individual candidate hits identified by uptake assays. After 24 h, cells were washed  
807 thrice with ice-cold phosphate-buffered saline, detached by mechanical scraping, and  
808 harvested by centrifugation at 1000 x g for 5 min. The cell pellet was lysed in a buffer  
809 containing Tris-HCl, pH 8.0, 150 mM NaCl, 1% dodecyl maltoside, 1 mM EDTA, and  
810 protease inhibitors (Complete<sup>TM</sup>, Roche Applied Science). This soluble protein lysate was

811 separated from the detergent-insoluble material by centrifugation (16,000 × g for 15 min at 4  
812 °C). An aliquot of this lysate (20 µg) was mixed with 1% SDS and 20 mM DTT containing  
813 sample buffer, denatured at 45 °C for 30 min, and resolved in denaturing polyacrylamide gels.  
814 After protein transfer onto nitrocellulose membranes, the blots were probed with an antibody  
815 against GFP (rabbit, ab290) at a 1:3000 dilution overnight. This immunoreactivity was  
816 detected using a horseradish peroxidase conjugated secondary antibody (1:5000, Amersham  
817 ECL Prime Western Blotting Detection Reagent). In separate experiments, lysates were  
818 prepared from cells treated in the absence or presence of 30 µM DG4-69; these were  
819 incubated in the presence and absence of endoglycosidase H (New England Biolabs) (16 =  
820 Asjad et al., 2017) and aliquots (20 µg) were then resolved electrophoretically as described  
821 above. Densitometric analyses of individual blots were done using ImageJ.

822

### 823 **Fly genetics, treatment and locomotion assay**

824 The transgenic UAS reporter line for YFP-tagged hDAT-PG<sup>584, 585</sup>AA was generated using  
825 pUASg-attB vector (gift from Drs. Bischof and Basler, University of Zürich). The sequenced  
826 construct was injected into embryos from ZH-86Fb flies (Bloomington stock no 24749).  
827 Positive transformants were selected and crossed with balancer flies (Bloomington stock no.  
828 3704). Fumin flies (*fmn* or DAT-KO mutant flies) was a generous gift from Dr. Kume,  
829 Nagoya City University, Japan. Tyrosine hydroxylase Gal4 (*TH-Gal4*, Bloomington stock no.  
830 8848) was used to drive the expression of hDAT-PG<sup>584, 585</sup>AA in dopaminergic neurons.  
831 Isogenized *fmn* and *w<sup>1118</sup>* flies were used as control. The genotypes of flies used in Fig. 7a and  
832 b were *w<sup>1118</sup>*; *fmn(w; roo}{DAT<sup>fmn</sup>}; TH-Gal4/UAS-hDAT- PG<sup>584, 585</sup>AA* (PG<sup>584, 585</sup>AA),  
833 *w<sup>1118</sup>/y; fmn(w; roo}{DAT<sup>fmn</sup>}; +/+* (*Fmn*) and *w<sup>1118</sup>*. All flies were kept at 25 °C in a 12-h  
834 light/12-h dark cycle, and all crosses were performed at 25 °C. As described previously (14 =  
835 Kasture et al., 2016), locomotion assay was performed on three-to-five-day old male flies  
836 using *Drosophila* activity monitor system (DAM2, Trikinetics, Waltham, MA). Briefly,  
837 individual flies were housed in 5-mm-diameter glass tubes carrying food pellet supplemented  
838 with specified concentrations of noribogaine and **9b**. Flies were entrained for 12h:12h day:  
839 night rhythm for first two days and locomotion activity was studied on second day in  
840 subsequent 12h; 12h dark: dark phase. Locomotion activity was measured in 1 min bins and  
841 pySolo software (Gilestro and Cirelli, 2009) was used to quantify sleep time.

842

843

844

845



846 **Supporting Information**  
847 **Synthesis**

848 All chemicals and solvents were purchased from chemical suppliers unless otherwise stated  
849 and used without further purification.  $^1\text{H}$  and  $^{13}\text{C}$  NMR spectra were acquired using a Varian  
850 Mercury Plus 400 spectrometer at 400 MHz and 100 MHz, respectively. Chemical shifts are  
851 reported in parts-per-million (ppm) and referenced according to deuterated solvent for  $^1\text{H}$   
852 NMR spectra ( $\text{CDCl}_3$ , 7.26;  $\text{D}_2\text{O}$ , 4.79 or  $\text{DMSO-d}_6$ , 2.50) and  $^{13}\text{C}$  NMR spectra ( $\text{CDCl}_3$ , 77.2  
853 or  $\text{DMSO-d}_6$ , 39.52). Gas chromatography-mass spectrometry (GC/MS) data were acquired  
854 (where obtainable) using an Agilent Technologies (Santa Clara, CA) 7890B GC equipped  
855 with an HP-5MS column (cross-linked 5% PH ME siloxane, 30 m  $\times$  0.25 mm i.d.  $\times$  0.25  $\mu\text{m}$   
856 film thickness) and a 5977B mass-selective ion detector in electron-impact mode. Ultrapure  
857 grade helium was used as the carrier gas at a flow rate of 1.2 mL/min. The injection port and  
858 transfer line temperatures were 250 and 280  $^\circ\text{C}$ , respectively, and the oven temperature  
859 gradient used was as follows: the initial temperature (70  $^\circ\text{C}$ ) was held for 1 min and then  
860 increased to 300  $^\circ\text{C}$  at 20  $^\circ\text{C}/\text{min}$  over 11.5 min, and finally maintained at 300  $^\circ\text{C}$  for 4 min.  
861 All column chromatography was performed using a Teledyne Isco CombiFlash RF flash  
862 chromatography system. Combustion analyses were performed by Atlantic Microlab, Inc.  
863 (Norcross, GA) and agree with  $\pm 0.4\%$  of calculated values. HRMS (mass error within 5 ppm)  
864 and MS/MS fragmentation analysis were performed on a LTQ-Orbitrap Velos (Thermo-  
865 Scientific, San Jose, CA) coupled with an ESI source in positive ion mode to confirm the  
866 assigned structures and regiochemistry. All melting points were determined on an OptiMelt  
867 automated melting point system and are uncorrected. On the basis of NMR and combustion  
868 data, all final compounds are  $>95\%$  pure.

869  
870 *3-(2-(8-azabicyclo[3.2.1]octan-8-yl)ethyl)-1H-indole (3a)*. 8-Azabicyclo[3.2.1]octane (**1**)  
871 (222.4 mg, 2 mmol), 3-(2-bromoethyl)-1H-indole (448.2 mg, 2 mmol),  $\text{K}_2\text{CO}_3$  (1.1 g, 8  
872 mmol) and acetonitrile (24 mL) were added in a sealed bottle (100 mL). The reaction mixture  
873 was stirred at 100  $^\circ\text{C}$  overnight and filtered. The filtrate was evaporated and purified by flash  
874 column chromatography ( $\text{DCM}/\text{MeOH}/\text{NH}_4\text{OH} = 95 : 5 : 0.5$ ) to give the product (470 mg,  
875 92% yield) as a yellow oil. The free base was converted to the HCl salt and recrystallized  
876 from methanol to give a white solid. Mp 247-248  $^\circ\text{C}$ ; GC/MS (EI)  $m/z$  254 ( $\text{M}^+$ );  $^1\text{H}$  NMR  
877 (400 MHz,  $\text{CDCl}_3$ )  $\delta$  8.05 (s, 1H), 7.62-7.63 (m, 1H), 7.34-7.36 (m, 1H), 7.02-7.19 (m, 3H),  
878 3.34 (m, 2H), 2.95-2.99 (m, 2H), 2.68-2.72 (m, 2H), 1.94-1.99 (m, 2H), 1.76-1.85 (m, 2H),

879 1.35-1.64 (m, 6H);  $^{13}\text{C}$  NMR (100 MHz,  $\text{CDCl}_3$ )  $\delta$  136.2, 127.6, 121.9, 121.4, 119.2, 118.9,  
880 114.9, 111.1, 59.6, 53.4, 30.7, 26.5, 25.0, 16.7, ; Anal. ( $\text{C}_{17}\text{H}_{22}\text{N}_2 \cdot \text{HCl}$ ) C, H, N.

881 *3-(3-(8-azabicyclo[3.2.1]octan-8-yl)propyl)-1H-indole (3b)*. 3-(1H-indol-3-yl)propanoic  
882 acid (378.4 mg, 2 mmol) was dissolved in THF (20 mL), CDI (1 equiv) was added and stirred  
883 for 2 h at rt followed by adding 8-azabicyclo[3.2.1]octane (**1**) (222.4 mg, 2 mmol) in THF  
884 (13 mL). The reaction mixture was stirred overnight at rt. The solvent was removed *in vacuo*  
885 and residue was diluted with  $\text{CHCl}_3$  (50 mL) and washed with saturated aq  $\text{Na}_2\text{CO}_3$  solution  
886 (2 x 30 mL). The organic layer was dried with  $\text{MgSO}_4$  and concentrated *in vacuo*. The crude  
887 product was purified by column chromatography (DCM/MeOH/ $\text{NH}_4\text{OH}$  = 97 : 3 : 0.5) to give  
888 the amide as yellow oil. The amide was dissolved in anhydrous THF (5.6 mL) and added  
889 dropwise to the suspension of LAH (110 mg, 2.84 mmol) in THF (2 mL) at 0 °C. The  
890 reaction mixture was allowed to warm to rt and stirred for 3 h.  $\text{H}_2\text{O}$  (0.3 mL) was added  
891 carefully at 0 °C, followed by the addition of 0.5 mL of aq NaOH (2 M). The resulting  
892 mixture was filtered, and the filtrate was dried ( $\text{K}_2\text{CO}_3$ ) filtered and the solvent was removed  
893 *in vacuo*. The residue was purified by column chromatography (DCM/MeOH/ $\text{NH}_4\text{OH}$  = 95 :  
894 5 : 0.5) to give the product (250 mg, 47% yield over two steps) as a yellow oil. The free base  
895 was converted to the HCl salt and recrystallized from methanol to give a tan foam; GC/MS  
896 (EI)  $m/z$  268 ( $\text{M}^+$ );  $^1\text{H}$  NMR (400 MHz,  $\text{CDCl}_3$ )  $\delta$  7.98 (s, 1H), 7.60-7.62 (m, 1H), 7.33-7.35  
897 (m, 1H), 6.99-7.19 (m, 3H), 3.20 (m, 2H), 2.76-2.80 (m, 2H), 2.42-2.46 (m, 2H), 1.87-1.95  
898 (m, 4H), 1.41-1.78 (m, 6H), 1.26-1.33 (m, 2H);  $^{13}\text{C}$  NMR (100 MHz,  $\text{CDCl}_3$ )  $\delta$  136.3, 127.6,  
899 121.8, 121.0, 119.0, 116.7, 111.0, 59.4, 52.3, 30.7, 29.2, 26.4, 23.1, 16.8; Anal. ( $\text{C}_{18}\text{H}_{24}\text{N}_2 \cdot$   
900  $\text{HCl} \cdot 0.5\text{H}_2\text{O} \cdot 0.25 i\text{-PrOH}$ ) C, H, N.

901 *3-(2-(8-azabicyclo[3.2.1]octan-8-yl)ethyl)-5-fluoro-1H-indole (3c)*. Compound **3c** was  
902 prepared as described for **3b** using 8-azabicyclo[3.2.1]octane (**1**) (111.2 mg, 1 mmol) and 3-  
903 (5-fluoro-1H-indol-3-yl)propanoic acid (207.2mg, 1 mmol) to give the product (250 mg, 28%  
904 yield over two steps) as a yellow oil. GC/MS (EI)  $m/z$  286 ( $\text{M}^+$ );  $^1\text{H}$  NMR (400 MHz,  $\text{CDCl}_3$ )  
905  $\delta$  8.58 (s, 1H), 7.21-7.24 (m, 2H), 6.89-6.96 (m, 2H), 3.22-3.24 (m, 2H), 2.70-2.74 (m, 2H)  
906 2.43-2.47 (m, 2H), 1.73-1.94 (m, 6H), 1.30-1.58 (m, 6H) ;  $^{13}\text{C}$  NMR (100 MHz,  $\text{CDCl}_3$ )  $\delta$   
907 158.7, 156.4, 132.8, 128.1, 128.0, 123.0, 116.7, 116.6, 111.6, 111.5, 110.1, 110.0, 103.9,  
908 103.6, 59.5, 52.2, 30.6, 29.1, 26.4, 23.0, 16.7; Anal. ( $\text{C}_{18}\text{H}_{23}\text{FN}_2 \cdot 0.5\text{H}_2\text{O}$ ) C, H, N.

909 *3-(2-(8-azabicyclo[3.2.1]octan-8-yl)ethyl)-5-methoxy-1H-indole (3d)*. Compound **3d** was  
910 prepared as described for **3b** using 8-azabicyclo[3.2.1]octane (**1**) (222.4 mg, 2 mmol) and 2-  
911 (5-methoxy-1H-indol-3-yl)acetic acid (410.0 mg, 2 mmol) to give the product (380 mg, 49%  
912 yield over two steps) as a brown oil. The free base was converted to the HCl salt and

913 recrystallized from methanol to give a tan foam; GC/MS (EI)  $m/z$  284 ( $M^+$ );  $^1H$  NMR (400  
914 MHz,  $CDCl_3$ )  $\delta$  7.89 (s, 1H), 7.22-7.24 (m, 1H), 7.07 (s, 1H), 7.00 (s, 1H), 6.83-6.86 (m, 1H),  
915 3.86 (s, 3H), 3.34-3.35 (m, 2H), 2.91-2.95 (m, 2H), 2.67-2.70 (m, 2H), 1.95-1.99 (m, 2H),  
916 1.78-1.85 (m, 2H), 1.46-1.61 (m, 6H);  $^{13}C$  NMR (100 MHz,  $CDCl_3$ )  $\delta$  153.9, 131.3, 128.0,  
917 122.2, 114.6, 112.1, 111.8, 100.8, 59.6, 55.9, 53.3, 30.7, 26.5, 25.0, 16.7 ; Anal. ( $C_{18}H_{24}N_2O \cdot$   
918  $HCl \cdot H_2O$ ) C, H, N.

919 *3-(3-(-8-azabicyclo[3.2.1]octan-8-yl)propyl)-5-methoxy-1H-indole (3e)*. Compound **3e** was  
920 prepared as described in for **3b** using 8-azabicyclo[3.2.1]octane (**1**) (222.4 mg, 2 mmol) and  
921 3-(5-methoxy-1H-indol-3-yl)propanoic acid (438.0 mg, 2 mmol) to give the product (380 mg,  
922 79% yield over two steps) as a tan oil; GC/MS (EI)  $m/z$  298 ( $M^+$ );  $^1H$  NMR (400 MHz,  
923  $CDCl_3$ )  $\delta$  8.07 (s, 1H), 7.21-7.24 (m, 1H), 7.04 (s, 1H), 6.95 (s, 1H), 6.83-6.94 (m, 1H), 3.86  
924 (s, 3H), 3.21-3.23 (m, 2H), 2.73-2.76 (m, 2H), 2.44-2.48 (m, 2H), 1.87-1.94 (m, 4H), 1.72-  
925 1.80 (m, 2H), 1.43-1.59 (m, 4H), 1.30-1.34 (m, 2H);  $^{13}C$  NMR (100 MHz,  $CDCl_3$ )  $\delta$  153.8,  
926 131.5, 128.0, 121.9, 116.4, 112.0, 111.7, 100.9, 59.4, 56.0, 52.3, 30.7, 29.1, 26.4, 23.1, 16.7;  
927 Anal. ( $C_{19}H_{26}N_2O \cdot 0.5H_2O$ ) C, H, N.

928 *3-(2-(8-azabicyclo[3.2.1]octan-8-yl)ethyl)-1H-indol-5-ol (3f)*. Compound **3f** was prepared as  
929 described for **3b** using 8-azabicyclo[3.2.1]octane (**1**) (222.4 mg, 2 mmol) and 2-(5-hydroxy-  
930 1H-indol-3-yl)acetic acid (382.4 mg, 2 mmol) to give the product (158 mg, 29% yield over  
931 two steps) as a tan oil; GC/MS (EI)  $m/z$  270 ( $M^+$ );  $^1H$  NMR (400 MHz,  $CDCl_3$ )  $\delta$  8.12 (s,  
932 1H), 7.11-7.13 (m, 1H), 6.87-6.88 (m, 2H), 6.75-6.78 (m, 1H), 3.34-3.35 (m, 2H), 2.91-2.95  
933 (m, 2H), 2.68-2.72 (m, 2H), 1.84-1.95 (m, 4H), 1.45-1.58 (m, 4H), 1.30-1.33 (m, 2H);  $^{13}C$   
934 NMR (100 MHz,  $CDCl_3$ )  $\delta$  150.3, 131.2, 128.1, 122.5, 113.3, 112.8, 111.9, 103.6, 59.5, 52.9,  
935 50.6, 29.8, 26.3, 24.2, 16.4 ; Anal. ( $C_{17}H_{22}N_2O \cdot 0.75H_2O$ ) C, H, N

936 *2-(2-(1H-indol-3-yl)ethyl)-2-azabicyclo[2.2.2]octane (4a)*. Compound **4a** was prepared as  
937 described for **3a** using 2-azabicyclo[2.2.2]octane (**2**) (222.4 mg, 2 mmol) and 3-(2-  
938 bromoethyl)-1H-indole (448.2 mg, 2 mmol) to give the product (370 mg, 73% yield) as a  
939 yellow oil. The free base was converted to the HCl salt and recrystallized from methanol to  
940 give a tan solid. Mp 251-253 °C; GC/MS (EI)  $m/z$  254 ( $M^+$ );  $^1H$  NMR (400 MHz,  $CDCl_3$ )  $\delta$   
941 8.00 (s, 1H), 7.63-7.65 (m, 1H), 7.34-7.36 (m, 1H), 7.04-7.20 (m, 3H), 2.93-2.97 (m, 2H),  
942 2.81-2.89 (m, 4H), 2.66-2.67 (m, 1H), 1.96-2.02 (m, 2H) 1.46-1.72 (m, 7H);  $^{13}C$  NMR (100  
943 MHz,  $CDCl_3$ )  $\delta$  136.2, 127.6, 121.9, 121.4, 119.1, 119.0, 115.0, 111.0, 57.6, 56.8, 49.6, 25.8,  
944 25.0, 24.4, 24.3 ; Anal. ( $C_{17}H_{22}N_2 \cdot HCl \cdot 0.25H_2O$ ) C, H, N.

945 *2-(3-(1H-indol-3-yl)propyl)-2-azabicyclo[2.2.2]octane (4b)*. Compound **4b** was prepared as  
946 described for **3b** using 2-azabicyclo[2.2.2]octane (**2**) (180 mg, 1.6 mmol) and 3-(1H-indol-3-

947 yl)propanoic acid (302.7 mg, 1.6 mmol) to give the product (350 mg, 82% yield over two  
948 steps) as a yellow oil. The free base was converted to the HCl salt and recrystallized from  
949 methanol to give a tan foam; GC/MS (EI)  $m/z$  268 ( $M^+$ );  $^1H$  NMR (400 MHz,  $CDCl_3$ )  $\delta$  8.00  
950 (s, 1H), 7.61-7.63 (m, 1H), 7.33-7.36 (m, 1H), 7.08-7.20 (m, 2H), 6.98 (m, 1H),  $^{13}C$  NMR  
951 (100 MHz,  $CDCl_3$ )  $\delta$  136.2, 127.6, 121.9, 121.4, 119.1, 119.0, 115.0, 111.0, 57.6, 56.8, 49.6,  
952 25.8, 25.0, 24.4, 24.3; Anal. ( $C_{18}H_{24}N_2 \cdot HCl \cdot 0.5H_2O$ ) C, H, N.

953 *3-(2-(8-azabicyclo[3.2.1]octan-8-yl)ethyl)-5-fluoro-1H-indole (4c)*. Compound **4c** was  
954 prepared as for **3b** using 2-azabicyclo[2.2.2]octane (**2**) (180.0 mg, 1.62 mmol) and 3-(5-  
955 fluoro-1H-indol-3-yl)propanoic acid (335.4 mg, 1.62 mmol) to give the product (140 mg,  
956 30% yield over two steps) as a yellow oil. GC/MS (EI)  $m/z$  286 ( $M^+$ );  $^1H$  NMR (400 MHz,  
957  $CDCl_3$ )  $\delta$  8.51 (s, 1H), 7.20-7.26 (m, 2H), 6.88-7.00 (m, 2H), 2.59-3.67 (m, 7H), 1.90-1.96  
958 (m, 4H) 1.44-1.68 (m, 7H);  $^{13}C$  NMR (100 MHz,  $CDCl_3$ )  $\delta$  158.8, 156.4, 132.8, 128.0, 127.9,  
959 123.2, 116.4, 116.3, 111.6, 110.2, 109.9, 103.8, 103.6, 62.7, 56.3, 56.1, 49.6, 30.0, 27.9, 25.5,  
960 24.6, 23.9, 22.8; Anal. ( $C_{18}H_{23}FN_2 \cdot 0.5H_2O$ ) C, H, N.

961 *Nortropidene (6)*. Nortropine (**5**; 10.0 g, 78.6 mmol) was added portion wise to sulfuric acid  
962 (10 mL) cooled in an ice bath, then stirred at 160 °C for 4 h. Once cooled to rt, the reaction  
963 mixture was diluted with 50 mL  $H_2O$ , 50 mL NaOH (12.5 M), and extracted with  $Et_2O$  (3x 75  
964 mL). The combined organic phases were washed with brine (50 mL), dried over  $MgSO_4$ , and  
965 concentrated *in vacuo* to give the title compound as a light orange oil (4.0 g, 47% yield). The  
966 free base proved unstable overtime. Thus, it was converted to the HCl salt for long term  
967 storage by dissolving in  $EtOH$ /conc. HCl, concentrated *in vacuo*, and triturated with  
968  $DCM/Et_2O$  to give a white solid.  $^1H$  NMR (400 MHz,  $D_2O$ )  $\delta$  6.01 (m, 1H), 5.81 (m, 1H),  
969 4.22 (m, 2H), 2.81 (d,  $J = 24$  Hz, 1H), 2.27 (m, 3H), 2.13 (m, 1H), 1.96 (m, 1H). HRMS:  
970 found  $m/z = 110.0964$  ( $MH^+$ ), calcd for  $C_7H_{12}N$  ( $MH^+$ ).

971 *1-(8-azabicyclo[3.2.1]oct-2-en-8-yl)-2-(1H-indol-3-yl)ethan-1-one (7a)*. To a solution of  
972 indole-3-acetic acid (1.75 g, 10 mmol) in THF (50 mL) was added CDI (1.95 g, 12 mmol),  
973 and the reaction stirred at rt for 2 h. A solution of **6** (1.09 g, 10 mmol) in THF (1 mL) was  
974 added to the reaction mixture and stirring continued overnight. The reaction mixture was  
975 concentrated, diluted with  $EtOAc$  (100 mL), and successively washed with 1N HCl (2x 50  
976 mL), sat.  $NaHCO_3$  (1x 50 mL), and brine (1x 50 mL). The extract was dried over  $MgSO_4$ ,  
977 concentrated *in vacuo*, re-dissolved in minimal  $DCM$  and precipitated with hexane to give the  
978 title compound as an off-white powder and mixture of two diastereomers (A:B, 0.45:0.55)  
979 (2.08 g, 78% yield). Diastereomer A:  $^1H$  NMR (400 MHz,  $CDCl_3$ )  $\delta$  8.32 (s, 1H), 7.61 (d,  $J =$   
980 8 Hz, 1H), 7.33 (d,  $J = 8$  Hz, 1H), 7.12 (m, 3H), 5.99 (m, 1H), 5.47 (m, 1H), 4.89 (m, 1H),

981 4.33 (m, 1H), 3.79 (m, 2H), 2.43 (d,  $J = 20$  Hz, 1H), 2.08 (m, 1H), 1.87 (m, 3H), 1.68 (m,  
982 1H). Diastereomer B:  $^1\text{H}$  NMR (400 MHz,  $\text{CDCl}_3$ )  $\delta$  8.28 (s, 1H), 7.61 (d,  $J = 8$  Hz, 1H),  
983 7.33 (d,  $J = 8$  Hz, 1H), 7.12 (m, 3H), 5.81 (m, 1H), 5.47 (m, 1H), 4.79 (m, 1H), 4.33 (m, 1H),  
984 3.79 (m, 2H), 2.82 (d,  $J = 20$  Hz, 1H), 2.08 (m, 1H), 1.87 (m, 3H), 1.68 (m, 1H). HRMS:  
985 found  $m/z = 267.1494$  ( $\text{MH}^+$ ), calcd for  $\text{C}_{17}\text{H}_{19}\text{N}_2\text{O}$  ( $\text{MH}^+$ ).

986 *1-(8-azabicyclo[3.2.1]oct-2-en-8-yl)-2-(5-fluoro-1H-indol-3-yl)ethan-1-one (7b)*. To a  
987 solution of 5-fluoro-indole-3-acetic acid (0.976 g, 5.05 mmol) in THF (25 mL) was added  
988 CDI (0.973 g, 6 mmol), and the reaction stirred at rt for 2 h. The HCl salt of **6** (0.874 g, 6  
989 mmol) was added as a solid, followed by *N,N*-diisopropylethylamine (1.05 mL, 6 mmol) and  
990 stirring continued overnight. The reaction mixture was diluted with EtOAc (100 mL), and  
991 successively washed with 1N HCl (3x 50 mL), sat.  $\text{NaHCO}_3$  (1x 50 mL), and brine (1x 50  
992 mL). The product was purified by column chromatography (100% DCM to  
993 DCM/MeOH/ $\text{NH}_4\text{OH} = 90 : 10 : 1$ ) to give the title compound as a light peach-colored solid  
994 and mixture of two diastereomers (A:B, 0.4:0.6) (1.174 g, 82% yield). Diastereomer A:  $^1\text{H}$   
995 NMR (400 MHz,  $\text{CDCl}_3$ )  $\delta$  8.16 (s, 1H), 7.25 (m, 2H), 7.14 (d,  $J = 8$  Hz, 1H), 6.92 (t,  $J = 8$   
996 Hz, 1H), 6.01 (m, 1H), 5.49 (m, 1H), 4.87 (m, 1H), 4.34 (m, 1H), 3.72 (m, 2H), 2.46 (d,  $J =$   
997 20 Hz, 1H), 2.12 (m, 1H), 1.90 (m, 3H), 1.72 (m, 1H). Diastereomer B:  $^1\text{H}$  NMR (400 MHz,  
998  $\text{CDCl}_3$ )  $\delta$  8.16 (s, 1H), 7.25 (m, 2H), 7.14 (d,  $J = 8$  Hz, 1H), 6.92 (t,  $J = 8$  Hz, 1H), 5.84 (m,  
999 1H), 5.49 (m, 1H), 4.79 (m, 1H), 4.34 (m, 1H), 3.72 (m, 2H), 2.83 (d,  $J = 20$  Hz, 1H), 2.12  
1000 (m, 1H), 1.90 (m, 3H), 1.72 (m, 1H). HRMS: found  $m/z = 285.1402$  ( $\text{MH}^+$ ), calcd for  
1001  $\text{C}_{17}\text{H}_{18}\text{N}_2\text{OF}$  ( $\text{MH}^+$ ).

1002 *1-(8-azabicyclo[3.2.1]oct-2-en-8-yl)-2-(5-methoxy-1H-indol-3-yl)ethan-1-one (7c)*. To a  
1003 solution of 5-methoxy-indole-3-acetic acid (0.371 g, 1.81 mmol) in THF (10 mL) was added  
1004 CDI (0.352 g, 2.17 mmol), and the reaction stirred at rt for 2 h. A solution of **6** (0.236 g, 2.17  
1005 mmol) in THF (1 mL) was added to the reaction mixture and stirring continued overnight.  
1006 The reaction mixture was diluted with EtOAc (40 mL), and successively washed with 1N HCl  
1007 (3x 25 mL), sat.  $\text{NaHCO}_3$  (1x 25 mL), and brine (1x 25 mL). The extract was dried over  
1008  $\text{MgSO}_4$ , concentrated *in vacuo*, and the residue was purified by column chromatography  
1009 (100% DCM to DCM/MeOH/ $\text{NH}_4\text{OH} = 90 : 10 : 1$ ) to give the title compound as an off-white  
1010 solid and mixture of two diastereomers (A:B, 0.4:0.6) (0.412 g, 77% yield). Diastereomer A:  
1011  $^1\text{H}$  NMR (400 MHz,  $\text{CDCl}_3$ )  $\delta$  8.09 (s, 1H), 7.24 (m, 1H), 7.06 (m, 2H), 6.85 (m 1H), 6.00  
1012 (m, 1H), 5.49 (m, 1H), 4.88 (m, 1H), 4.33 (m, 1H), 3.86 (s, 3H), 3.75 (m, 2H), 2.43 (d,  $J = 20$   
1013 Hz, 1H), 2.11 (m, 1H), 1.88 (m, 3H), 1.66 (m, 1H). Diastereomer B:  $^1\text{H}$  NMR (400 MHz,  
1014  $\text{CDCl}_3$ )  $\delta$  8.06 (s, 1H), 7.24 (m, 1H), 7.06 (m, 2H), 6.85 (m 1H), 5.81 (m, 1H), 5.49 (m, 1H),

1015 4.80 (m, 1H), 4.33 (m, 1H), 3.86 (s, 3H), 3.75 (m, 2H), 2.83 (d,  $J = 20$  Hz, 1H), 2.11 (m, 1H),  
1016 1.88 (m, 3H), 1.66 (m, 1H). HRMS: found  $m/z = 297.1601$  ( $MH^+$ ), calcd for  $C_{18}H_{21}N_2O_2$   
1017 ( $MH^+$ ).

1018 *(3R,4R,12S,12aR)-2,3,6,11,12,12a-hexahydro-3,12-ethanopyrrolo[1',2':1,2]azepino[4,5-*  
1019 *b]indol-5(1H)-one (8a)*. A 25 mL Schlenk tube in an argon atmosphere was charged with **7a**  
1020 (0.266 g, 1.00 mmol) and  $Pd(CH_3CN)_4(BF_4)_2$  (0.577 g, 1.30 mmol). Anhyd acetonitrile (10  
1021 mL) was added resulting in a dark red solution, which was stirred at rt overnight, maintaining  
1022 its appearance throughout the time of reaction. The flask was equipped with a deflated  
1023 balloon, converted to static argon, and a solution of  $NaBH_4$  (0.113 g, 3 mmol) in 4 mL EtOH  
1024 was added dropwise over 10 min, precipitating Pd(0) black and filling the balloon with  $H_2$   
1025 gas. The reaction continued to stir for 1 h, where most of the  $H_2$  was consumed and the  
1026 product precipitated along with the Pd(0) black. The reaction was diluted with 50 mL 20%  
1027 MeOH/DCM, vacuum filtered (Pd(0)), and the filtrate successively washed with 1N HCl (1x  
1028 20 mL) and brine (1x 20 mL), dried over  $MgSO_4$  and concentrated *in vacuo*. The product was  
1029 separated from byproducts by taking up in minimal DCM, diluted with  $Et_2O$ , and filtered to  
1030 give the title compound as an off-white solid (0.169 g, 63% yield).  $^1H$  NMR (400 MHz,  
1031 DMSO- $d_6$ )  $\delta$  10.92 (s, 1H), 7.47 (d,  $J = 8$  Hz, 1H), 7.25 (d,  $J = 8$  Hz, 1H), 7.03 (t,  $J = 8$  Hz,  
1032 1H), 6.97 (t,  $J = 8$  Hz, 1H), 4.57 (d,  $J = 8$  Hz, 1H), 4.27 (d,  $J = 8$  Hz, 1H), 3.92 (d,  $J = 16$  Hz,  
1033 1H), 3.41 (d,  $J = 16$  Hz, 1H), 2.98 (d,  $J = 8$  Hz, 1H), 2.24 (m, 2H), 2.00 (m, 2H), 1.80 (m,  
1034 2H), 1.53 (m, 1H), 1.21 (m, 1H).  $^{13}C$  NMR (100 MHz, DMSO- $d_6$ )  $\delta$  171.35, 136.57, 134.78,  
1035 127.28, 120.74, 118.39, 117.32, 110.62, 103.88, 55.91, 53.03, 38.29, 32.58, 28.69, 26.92,  
1036 25.78, 22.69. HRMS: found  $m/z = 267.1483$  ( $MH^+$ ), calcd for  $C_{17}H_{19}N_2O$  ( $MH^+$ ).

1037 *(3R,4R,12S,12aR)-8-fluoro-2,3,6,11,12,12a-hexahydro-3,12-*  
1038 *ethanopyrrolo[1',2':1,2]azepino[4,5-b]indol-5(1H)-one (8b)*. Compound **8b** was prepared as  
1039 described for **8a** using **7b** (0.142 g, 0.50 mmol) and  $Pd(CH_3CN)_4(BF_4)_2$  (0.289 g, 0.65 mmol)  
1040 to give the title compound (0.990 g, 70% yield) as a white solid.  $^1H$  NMR (400 MHz, DMSO-  
1041  $d_6$ )  $\delta$  11.04 (s, 1H), 7.26 (m, 2H), 6.86 (m, 1H), 4.56 (d,  $J = 8$  Hz, 1H), 4.27 (d,  $J = 8$  Hz, 1H),  
1042 3.90 (d,  $J = 16$  Hz, 1H), 3.38 (d,  $J = 16$  Hz, 1H), 2.98 (d,  $J = 8$  Hz, 1H), 2.23 (m, 2H), 1.99  
1043 (m, 2H), 1.79 (m, 2H), 1.51 (m, 1H), 1.18 (m, 1H).  $^{13}C$  NMR (100 MHz, DMSO- $d_6$ )  $\delta$  171.19,  
1044 156.88 (d,  $J_{c,f} = 230$  Hz), 138.83, 131.39, 127.61 (d,  $J_{c,f} = 10$  Hz), 111.46 (d,  $J_{c,f} = 9$  Hz),  
1045 108.63, (d,  $J_{c,f} = 25$  Hz), 104.38, (d,  $J_{c,f} = 4$  Hz), 102.34, (d,  $J_{c,f} = 23$  Hz), 55.79, 53.02,  
1046 38.36, 32.57, 28.64, 26.93, 25.78, 22.70. HRMS: found  $m/z = 285.1397$  ( $MH^+$ ), calcd for  
1047  $C_{17}H_{18}N_2OF$  ( $MH^+$ ).

1048 (3*R*,4*R*,12*S*,12*aR*)-8-methoxy-2,3,6,11,12,12*a*-hexahydro-3,12-  
1049 ethanopyrrolo[1',2':1,2]azepino[4,5-*b*]indol-5(1*H*)-one (**8c**). Compound **8c** was prepared as  
1050 for **8a** using **7c** (0.260 g, 0.88 mmol) and Pd(CH<sub>3</sub>CN)<sub>4</sub>(BF<sub>4</sub>)<sub>2</sub> (0.506 g, 1.14 mmol) to give the  
1051 title compound (0.210 g, 81% yield) as a white solid. <sup>1</sup>H NMR (400 MHz, DMSO-*d*<sub>6</sub>) δ 10.74  
1052 (s, 1H), 7.13 (d, *J* = 8 Hz, 1H), 6.99 (s, 1H), 6.67 (d, *J* = 8 Hz, 1H), 4.56 (d, *J* = 8 Hz, 1H),  
1053 4.27 (m, 1H), 3.89 (d, *J* = 16 Hz, 1H), 3.76 (s, 3H), 3.41 (d, *J* = 16 Hz, 1H), 2.95 (m, 1H),  
1054 2.25 (m, 2H), 2.00 (m, 2H), 1.78 (m, 2H), 1.52 (m, 1H), 1.21 (m, 1H). <sup>13</sup>C NMR (100 MHz,  
1055 DMSO-*d*<sub>6</sub>) δ 171.40, 153.18, 137.25, 129.81, 127.62, 111.26, 110.73, 103.78, 99.48, 55.91,  
1056 55.37, 52.99, 38.37, 32.64, 28.69, 26.92, 25.79, 22.78. HRMS: found *m/z* = 297.1586 (MH<sup>+</sup>),  
1057 calcd for C<sub>18</sub>H<sub>21</sub>N<sub>2</sub>O<sub>2</sub> (MH<sup>+</sup>).  
1058 (3*R*,4*R*,12*S*,12*aR*)-1,2,3,5,6,11,12,12*a*-octahydro-3,12-ethanopyrrolo[1',2':1,2]azepino[4,5-  
1059 *b*]indole (**9a**). To a suspension of **8a** (0.030 g, 0.11 mmol) in 3 mL THF at rt was added BMS  
1060 (0.20 mL, 2.1 mmol) and the reaction was stirred at reflux for 1 h. Once cooled to rt, the  
1061 reaction was slowly quenched with MeOH and concentrated *in vacuo*. The reaction was then  
1062 taken up in 3 M HCl (5 mL) and stirred at reflux overnight to ensure hydrolysis of the boron  
1063 complex with the product. The reaction was basified with 1 M NaOH and extracted with  
1064 DCM (3 x 10 mL). The combined organic phases were washed with brine, dried over MgSO<sub>4</sub>,  
1065 and concentrated *in vacuo*. The residue was purified by column chromatography (100% DCM  
1066 to DCM/MeOH/NH<sub>4</sub>OH = 90 : 10 : 1) to give the title compound as a white solid (0.019 g,  
1067 68% yield). <sup>1</sup>H NMR (400 MHz, CDCl<sub>3</sub>) δ 7.70 (s, 1H), 7.50 (m, 1H), 7.26 (m, 1H), 7.12 (m,  
1068 2H), 3.91 (d, *J* = 4 Hz, 1H), 3.49 (m, 1H), 3.38 (m, 2H), 3.17 (m, 1H), 3.03 (m, 1H), 2.80 (d,  
1069 *J* = 8 Hz, 1H), 2.29 (m, 1H), 2.09 (m, 3H), 1.75 (m, 3H), 1.08 (dd, *J* = 8, 16 Hz, 1H). <sup>13</sup>C  
1070 NMR (100 MHz, DMSO-*d*<sub>6</sub>) δ 139.23, 134.91, 128.27, 120.04, 117.92, 117.17, 111.39,  
1071 110.30, 56.25, 56.00, 47.98, 38.39, 29.18, 28.29, 23.88, 23.51, 21.82. HRMS: found *m/z* =  
1072 253.1698 (MH<sup>+</sup>), calcd for C<sub>17</sub>H<sub>21</sub>N<sub>2</sub> (MH<sup>+</sup>).  
1073 (3*R*,4*R*,12*S*,12*aR*)-8-fluoro-1,2,3,5,6,11,12,12*a*-octahydro-3,12-  
1074 ethanopyrrolo[1',2':1,2]azepino[4,5-*b*]indole (**9b**). Compound **9b** was prepared as described  
1075 for **9a** using **8b** (0.028 g, 0.10 mmol) and BMS (0.20 mL, 2.1 mmol) to give the title  
1076 compound as a white solid (0.019 g, 70% yield). <sup>1</sup>H NMR (400 MHz, CDCl<sub>3</sub>) δ 7.64 (s, 1H),  
1077 7.15 (m, 2H), 6.86 (m, 1H), 3.88 (d, *J* = 8 Hz, 1H), 3.48 (m, 1H), 3.38 (m, 2H), 3.09 (m, 1H),  
1078 2.97 (m, 1H), 2.77 (d, *J* = 8 Hz, 1H), 2.29 (m, 1H), 2.10 (m, 3H), 1.74 (m, 3H), 1.09 (dd, *J* =  
1079 8, 16 Hz, 1H). <sup>13</sup>C NMR (100 MHz, DMSO-*d*<sub>6</sub>) δ 156.74 (d, *J*<sub>c,f</sub> = 229 Hz), 141.23, 131.56,  
1080 128.46 (d, *J*<sub>c,f</sub> = 10 Hz), 111.77 (d, *J*<sub>c,f</sub> = 5 Hz), 111.08 (d, *J*<sub>c,f</sub> = 9 Hz), 107.88 (d, *J*<sub>c,f</sub> = 25

1081 Hz), 102.11 (d,  $J_{c,f} = 23$  Hz), 56.36, 56.22, 47.89, 38.24, 28.85, 27.96, 23.54, 23.20, 21.72.  
1082 HRMS: found  $m/z = 271.1604$  ( $MH^+$ ), calcd for  $C_{17}H_{20}N_2F$  ( $MH^+$ ).  
1083 *(3R,4R,12S,12aR)*-8-methoxy-1,2,3,5,6,11,12,12a-octahydro-3,12  
1084 ethanopyrrolo[1',2':1,2]azepino[4,5-*b*]indole (**9c**). Compound **9c** was prepared as described  
1085 for **9a** using **8c** (0.444 g, 1.5 mmol) and BMS (1.50 mL, 15.8 mmol) in THF (40 mL) without  
1086 the 3 M HCl reflux step to give the title compound as a white solid (0.365 g, 86% yield).  $^1H$   
1087 NMR (400 MHz,  $CDCl_3$ )  $\delta$  7.50 (s, 1H), 7.16 (d,  $J = 8$  Hz, 1H), 6.96 (s, 1H), 6.79 (d,  $J = 8$   
1088 Hz, 1H), 3.89 (m, 1H), 3.86 (s, 3H), 3.44 (m, 1H), 3.39 (m, 2H), 3.13 (m, 1H), 2.98 (m, 1H),  
1089 2.77 (m, 1H), 2.28 (m, 1H), 2.08 (m, 3H), 1.75 (m, 3H), 1.08 (m, 1H). HRMS: found  $m/z =$   
1090 283.1804 ( $MH^+$ ), calcd for  $C_{18}H_{23}N_2O$  ( $MH^+$ ).  
1091 *(3R,4R,12S,12aR)*-1,2,3,5,6,11,12,12a-octahydro-3,12-ethanopyrrolo[1',2':1,2]azepino[4,5-  
1092 *b*]indol-8-ol (**9d**). Compound **9d** was prepared as described for **9a** using **8c** (0.450 g, 1.5  
1093 mmol) and BMS (1.50 mL, 15.8 mmol) in THF (40 mL) with the 3 M HCl reflux step (12  
1094 mL, overnight) to give the title compound as a tan solid (0.078 g, 19% yield).  $^1H$  NMR (400  
1095 MHz,  $CDCl_3$ )  $\delta$  7.49 (s, 1H), 7.11 (d,  $J = 8$  Hz, 1H), 6.90 (s, 1H), 6.69 (d,  $J = 8$  Hz, 1H), 3.88  
1096 (d,  $J = 8$  Hz, 1H), 3.47 (m, 1H), 3.38 (m, 2H), 3.06 (m, 1H), 2.96 (m, 1H), 2.77 (d,  $J = 8$  Hz,  
1097 1H), 2.28 (m, 1H), 2.10 (m, 3H), 1.75 (m, 3H), 1.08 (dd,  $J = 8, 16$  Hz, 1H). HRMS: found  
1098  $m/z = 269.1654$  ( $MH^+$ ), calcd for  $C_{17}H_{21}N_2O$  ( $MH^+$ ).  
1099



1100 **Supplementary figures**

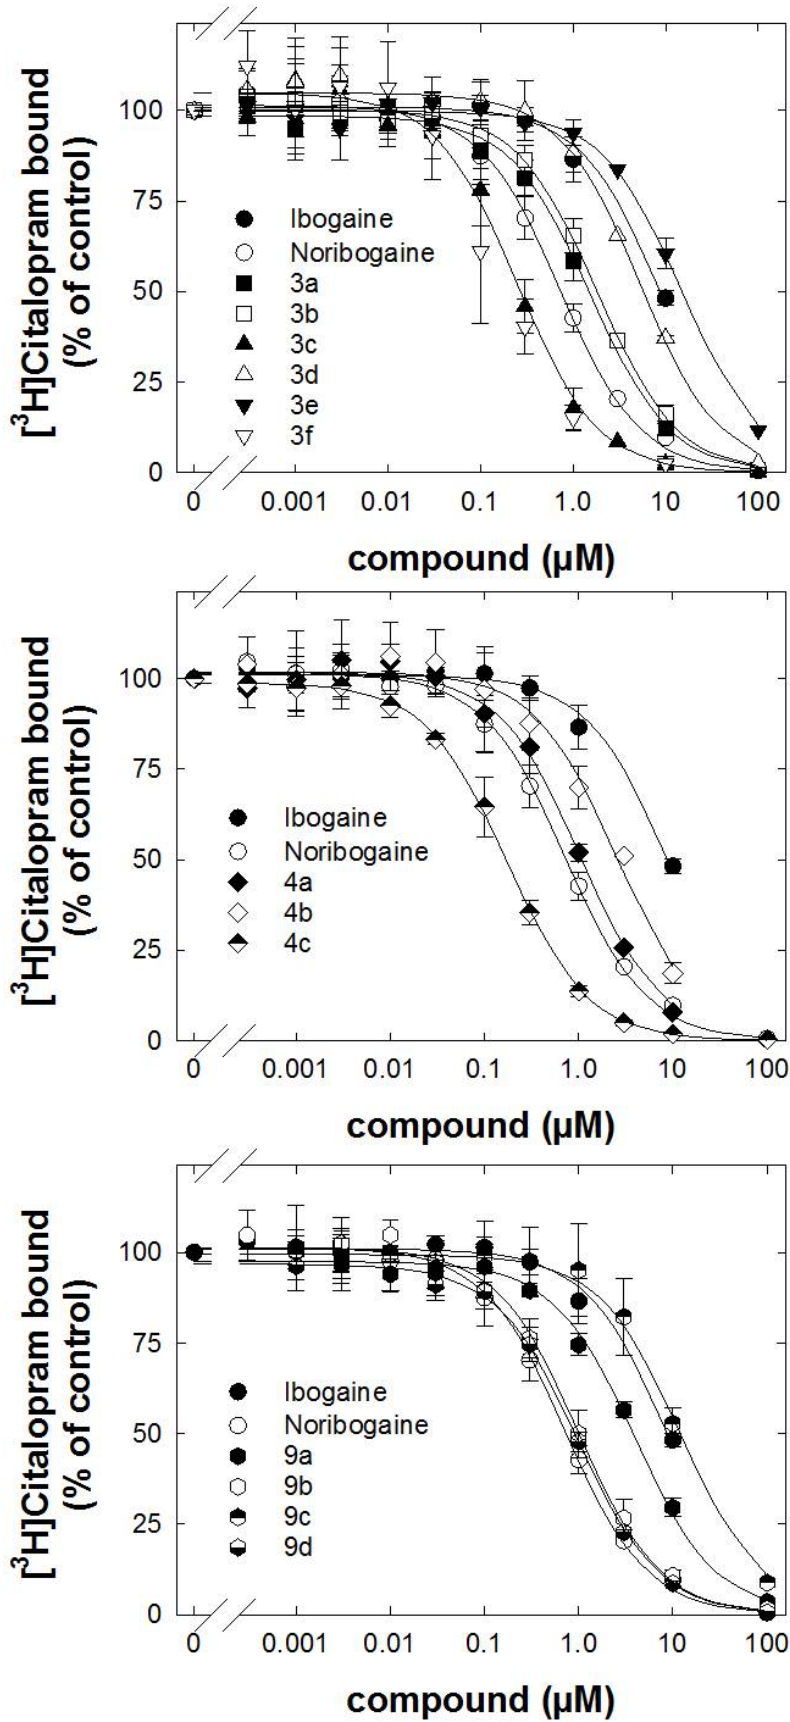

1101

1102 **Supplementary Figure 1. Inhibition by ibogaine analogs of [<sup>3</sup>H]citalopram binding to rat**  
1103 **SERT.** Brain stem membranes were dissected and prepared from male Sprague–Dawley rat  
1104 brains (see Methods). Membranes binding was conducted in 96-well polypropylene plates  
1105 containing 50  $\mu$ L of various concentrations of the inhibitor, diluted using 30% DMSO vehicle,  
1106 300  $\mu$ L of Tris buffer (SERT), 50  $\mu$ L of [<sup>3</sup>H]citalopram solution (final concentration 1.5 nM) and  
1107 100  $\mu$ L of tissue (2.0 mg/well original wet weight) for 60 min at room temperature (SERT).  
1108 Nonspecific binding was determined using 10  $\mu$ M fluoxetine, which was <10% of specific  
1109 binding. Data are represented as the means  $\pm$  S.D. (error bars) from at least three independent  
1110 experiments, each performed in triplicate. Specific binding (between 3000 and 5000 cpm) was  
1111 set to 100% to normalize for inter-assay variation. The solid curves were drawn by fitting the  
1112 data to the equation for a monophasic inhibition.  $K_i$ -values were calculated from the  $IC_{50}$  values  
1113 using the Cheng-Prusoff equation (see **Table 1**).  
1114

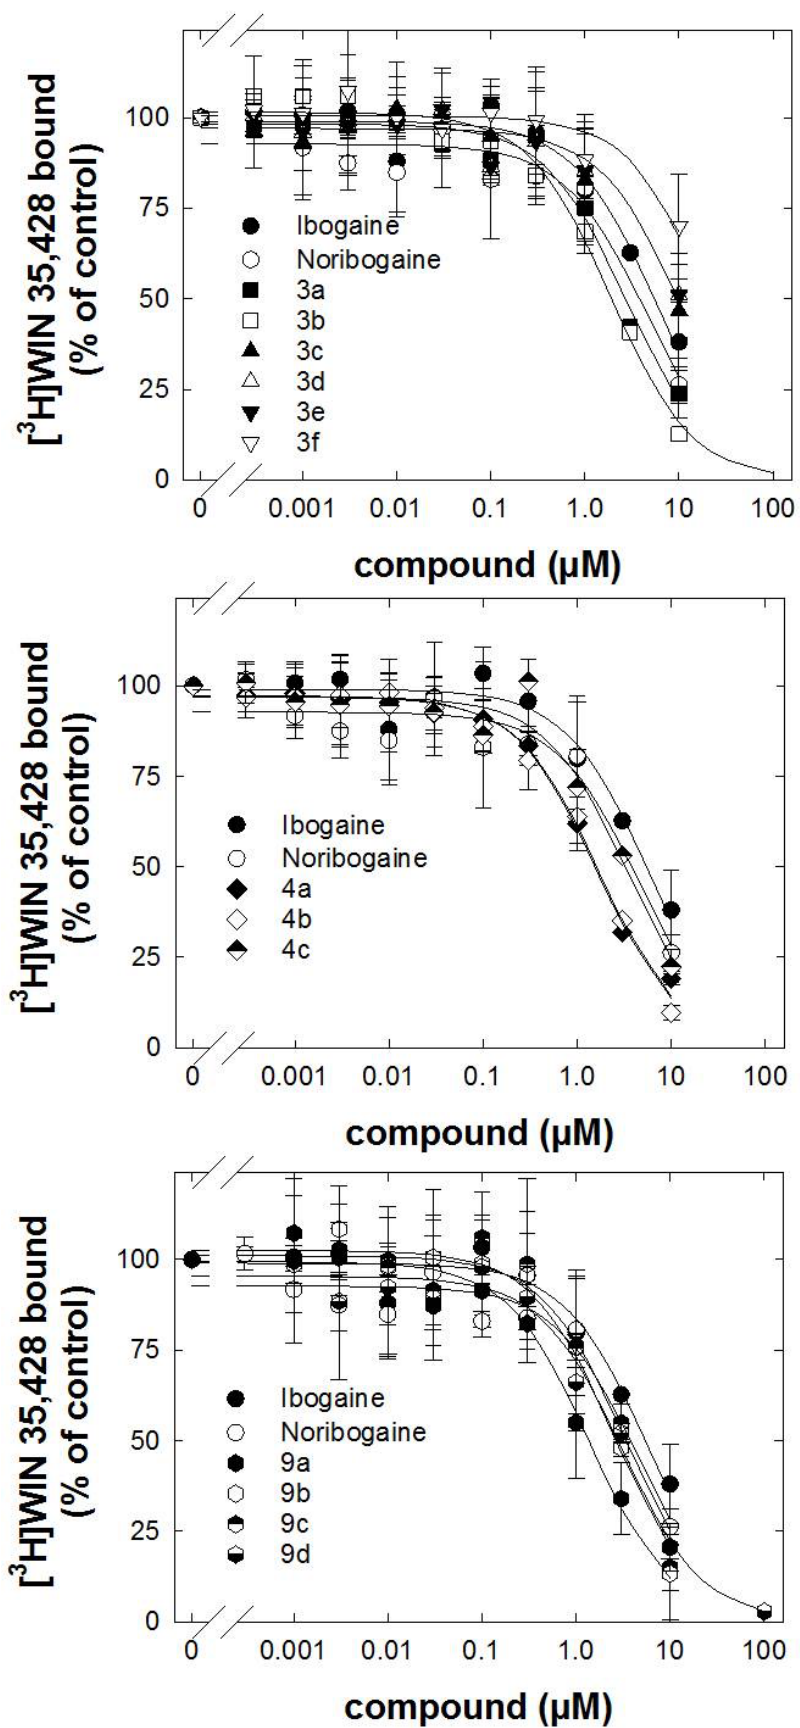

1115

1116

1117 **Supplementary Figure 2. Inhibition by ibogaine analogs of [<sup>3</sup>H]WIN 35,428 binding to rat DAT.**  
1118 Striatum membranes (for DAT) were dissected and prepared from male Sprague–Dawley rat brains  
1119 (see Methods). Membranes binding was conducted in 96-well polypropylene plates containing 50  $\mu$ L  
1120 of various concentrations of the inhibitor, diluted using 30% DMSO vehicle, 300  $\mu$ L of sucrose  
1121 phosphate buffer, 50  $\mu$ L of [<sup>3</sup>H]-WIN35,428 solution (final concentration 1.5 nM) and 100  $\mu$ L of tissue  
1122 (2.0 mg/well original wet weight) for 120 min at 0-4 °C. Nonspecific binding was determined using 10  
1123  $\mu$ M indatraline, which was <10% of specific binding. Data are represented as the means  $\pm$  S.D. (error  
1124 bars) from at least three independent experiments, each performed in triplicate. Specific binding  
1125 (between 3000 and 5000 cpm) was set to 100% to normalize for inter-assay variation. The solid  
1126 curves were drawn by fitting the data to the equation for a monophasic inhibition. Ki-values were  
1127 calculated from the IC50 values using the Cheng-Prusoff equation (see Table 1).  
1128

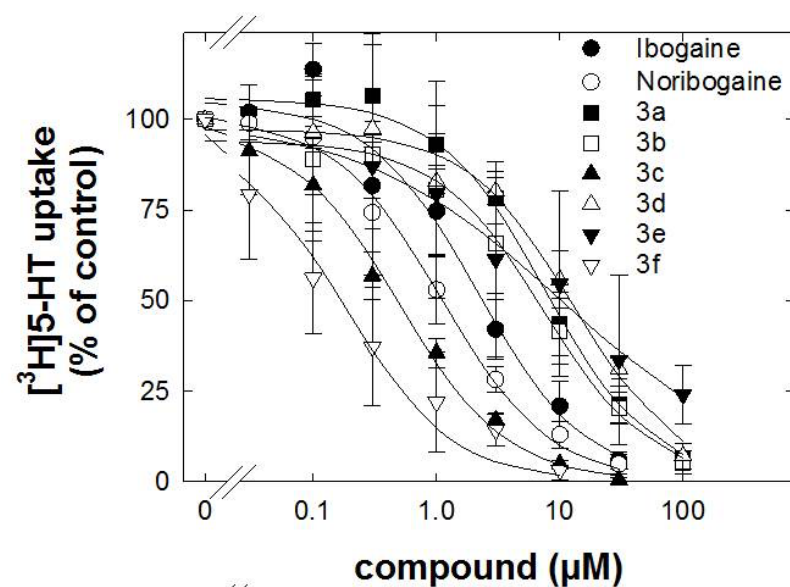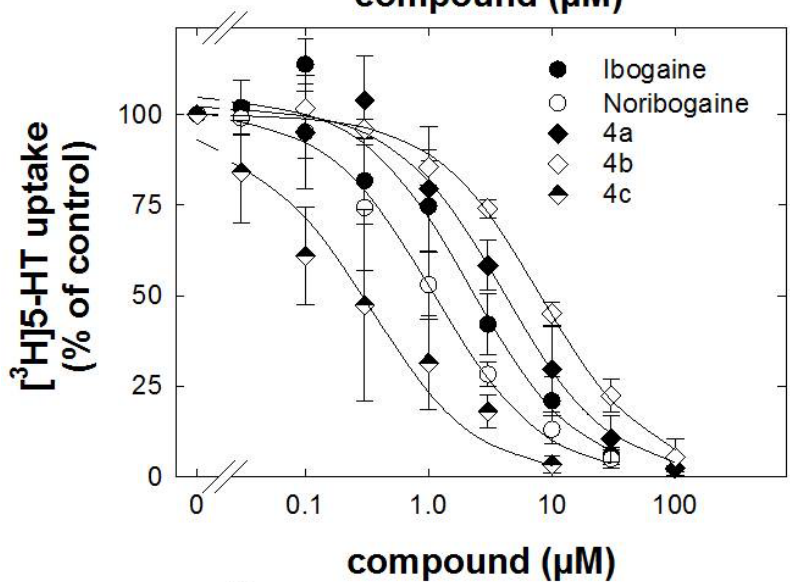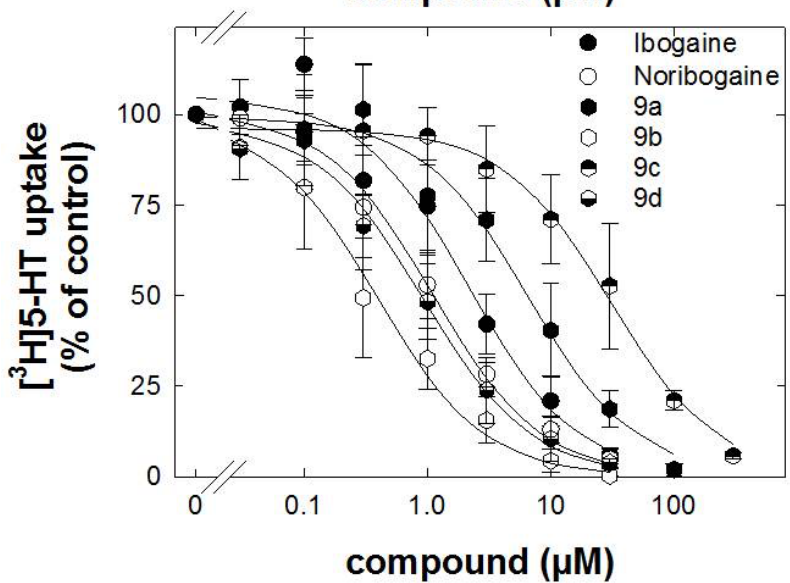

1130 **Supplementary Figure 3. Inhibition by ibogaine analogs of [<sup>3</sup>H]5-HT uptake by hSERT.** HEK293 cells  
1131 stably expressing wild-type YFP-hSERT were seeded onto 96-well plates for 24 h. Cells were  
1132 incubated with logarithmically spaced concentrations (0.003–300 μM) of ibogaine analogs for 10  
1133 minutes and subsequently with the same concentration of the ibogaine analogs with 0.4 μM [<sup>3</sup>H]5-HT  
1134 for 1 minute. Non-specific uptake was defined as cellular accumulation of radioactivity in the  
1135 presence of 30 μM paroxetine; this was <10% of total uptake. Specific uptake is the difference  
1136 between total and non-specific uptake. Data are the means ± S.D. from three independent  
1137 experiments done in triplicates. Specific uptake for SERT was  $4.46 \pm 1.47$  pmol·min<sup>-1</sup>·10<sup>-6</sup> cells and was  
1138 set to 100% to normalize for inter-assay variation. The solid curves were drawn by fitting the data to  
1139 the equation for a monophasic inhibition. The IC<sub>50</sub>-values are reported in **Table 1**.  
1140

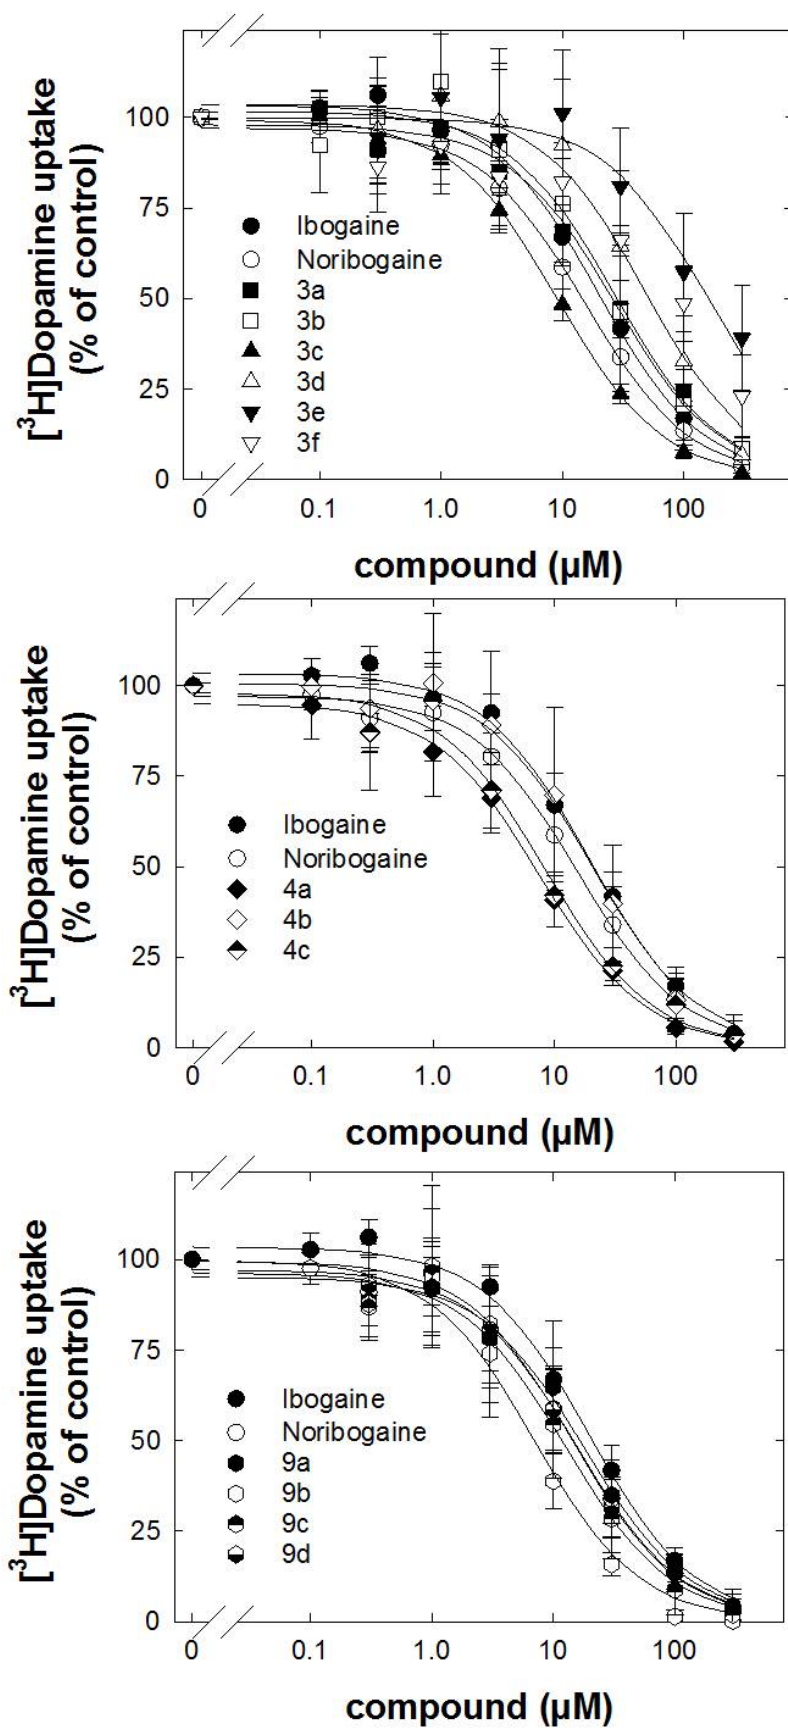

1141

1142 **Supplementary Figure 4. Inhibition by ibogaine analogs of [<sup>3</sup>H]5-DA uptake by hDAT.** HEK293 cells  
1143 stably expressing YFP-hDAT were seeded onto 96-well plates for 24 h. Cells were incubated with  
1144 logarithmically spaced concentrations (0.003–300 μM) of ibogaine analogs for 10 minutes and  
1145 subsequently with the same concentration of the ibogaine analogs with 0.4 μM of [<sup>3</sup>H]DA for 1  
1146 minute. Non-specific uptake was defined as cellular accumulation of radioactivity in the presence of  
1147 30 μM mazindol; this was <10% of total uptake. Specific uptake is the difference between total and  
1148 non-specific uptake. Data are the means  $\pm$  S.D. from three independent experiments done in  
1149 triplicates. Specific uptake for DAT was  $7.5 \pm 2.1$  pmol·min<sup>-1</sup>·10<sup>-6</sup> cells, respectively, and was set to  
1150 100% to normalize for inter-assay variation. The solid curves were drawn by fitting the data to the  
1151 equation for a monophasic inhibition. The IC<sub>50</sub>-values are reported in **Table 1**.  
1152  
1153
